# Supplementary material for: Atomically accurate structural tailoring of thiacalix[4]arene-protected copper(ii)-based metallamacrocycles
Source: Royal Society of Chemistry journal article supplement (doi:10.1039/d3dt00455d), 2023-01-01
Supplement: d3dt00455d1.pdf [file d3dt00455d1.pdf]

## Supporting Information

### Atomically Accurate Structural Tailoring of Thiacalix[4]arene-Protected Copper(II)-Based Metallamacrocycles

Wen-Lei Mu,<sup>a\*</sup> Linlin Wu,<sup>a\*</sup> Wei-Dong Yu,<sup>b\*</sup> Xiao-Yi Yi,<sup>a</sup> Jun Yan,<sup>a</sup> and Chao Liu<sup>\*a</sup>

<sup>a</sup> Hunan Provincial Key Laboratory of Chemical Power Sources, College of Chemistry and Chemical Engineering, Central South University, Changsha 410083, Hunan, P. R. China

<sup>b</sup> China College of Science, Hunan University of Technology and Business, Changsha 410000, P. R. China

<sup>c</sup> Institute of Environmental Research at Greater Bay Area; Key Laboratory for Water Quality and Conservation of the Pearl River Delta, Ministry of Education; Guangzhou Key Laboratory for Clean Energy and Materials, Guangzhou University, Guangzhou 510006, China

Corresponding Authors

\*(Chao Liu) E-mail: chaoliu@csu.edu.cn

## 1. Experimental Section

**Materials and Characterization.** All reagents were purchased commercially and were not further purified when used. Powder X-ray diffraction (PXRD) analysis were performed on a Rigaku Mini Flex II diffractometer at a  $2\theta$  range of  $3\text{--}50^\circ$  ( $5^\circ \text{ min}^{-1}$ ) with  $\text{CuK}\alpha$  radiation ( $\lambda = 1.54056 \text{ \AA}$ ). The solid-state UV/Vis spectra data of the cluster samples were obtained on UV-4000 spectrophotometer. Electrospray ionization mass spectrometry (ESI-MS) were performed on a Bruker Daltonik GmbH (Bruker, Germany). Thermogravimetric (TGA) patterns were recorded on a Mettler Toledo TGA/SDTA 851e analyzer in a  $\text{N}_2$  atmosphere. FT-IR spectra using KBr pellets were taken on a Bruker Vertex 70 Spectrometer.

Synthesis for compound  $\{\text{HNa}_2\text{Cu}_{12}\text{Cl}_3(\text{TC4A})_3(\text{PhPO}_3)_6(\text{H}_2\text{O})_2\} \cdot 9\text{PrOH} \{\text{Cu}_{12}\text{L}_3\}$ :  $\text{PhPO}_3\text{H}_2$  (26 mg, 0.16 mmol), TC4A (20mg, 0.03 mmol), CuCl (15mg, 0.15mmol), 3mL isopropanol and 50  $\mu\text{L}$  triethylamine were added to a 25 mL glass bottle. The resulting mixtures were sonicated for 5 min, then were transferred to a preheated oven at  $100^\circ\text{C}$  for 3 days. Red rectangle crystals were obtained after cooling to  $25^\circ\text{C}$  (yield:  $\sim 30\%$ , based on CuCl).

Synthesis for compound  $\{\text{H}_3\text{Cu}_{16}\text{Cl}_3(\text{TC4A})_4(\text{PhPO}_3)_8\} \cdot 5\text{DMF} \{\text{Cu}_{16}\text{L}_4\}$ :  $\text{PhPO}_3\text{H}_2$  (26 mg, 0.16 mmol), TC4A (20mg, 0.03 mmol), CuCl (15mg, 0.15mmol), 50  $\mu\text{L}$  triethylamine, 2 mL isopropanol and 1 mL DMF were added to a 25 mL glass bottle. After stirring for 10 min, the resulting mixtures were transferred to a preheated oven at  $100^\circ\text{C}$  for 3 days. Yellow rhomboid crystals were obtained after cooling to  $25^\circ\text{C}$  (yield:  $\sim 37\%$ , based on CuCl).

Synthesis for compound  $\{\text{H}_5\text{NaCu}_{12}(\text{TC4A})_4(\text{PhPO}_3)_8(\text{Sa})\} \cdot 7.5\text{PrOH} \{\text{Cu}_{12}\text{L}_3\text{-Sa}\}$ :  $\text{PhPO}_3\text{H}_2$  (26 mg, 0.16 mmol),  $\text{H}_2\text{Sa}$  (15 mg, 0.13 mmol), TC4A (20mg, 0.03 mmol), CuCl (15 mg, 0.15mmol), isopropanol (2mL), DMF(1mL) and triethylamine (50  $\mu\text{L}$ ) were added to a 25 mL glass bottle and transferred to a preheated oven at  $120^\circ\text{C}$  for 3 days. A large amount of yellow rectangle crystal was obtained after cooling to  $25^\circ\text{C}$  (yield:  $\sim 27\%$ , based on CuCl).

Synthesis for compound  $\{\text{Cu}_{16}\text{Cl}_4(\text{TC4A})_4(\text{PhPO}_3)_6(\text{Sa})_2\} \cdot 9\text{DMF} \{\text{Cu}_{16}\text{L}_4\text{-Sa}\}$ :  $\text{PhPO}_3\text{H}_2$  (26 mg, 0.16 mmol),  $\text{H}_2\text{Sa}$  (15 mg, 0.13 mmol), TC4A (20mg, 0.03 mmol), CuCl (15mg, 0.15mmol), 2 mL isopropanol and 1mL DMF were added to a 10mL glass bottle, and then added with 100  $\mu\text{L}$   $\text{Ti}(\text{O}^i\text{Pr})_4$ , 100 mL and 50  $\mu\text{L}$  triethylamine. After stirring for 10 min, the resulting mixtures were transferred to a preheated oven at  $80^\circ\text{C}$  for 3 days. Brownish yellow block crystals were obtained after cooling to  $25^\circ\text{C}$  (yield:  $\sim 8\%$ , based on CuCl).

**X-ray Crystal Structure Determination.** Single crystal diffraction data was collected on Bruker D8 Venture diffractometer with liquid metal Ga  $\text{K}\alpha$  radiation. The structures were solved using intrinsic phasing methods in ShelXT program and then refined by full-matrix least-squares on F2 using ShelXL-2014 in Olex<sup>2</sup> program. The hydrogen atoms were introduced at their geometric positions and refined as riding atom, and the positions of non-hydrogen atoms were refined with anisotropic displacement parameters during the final cycles. Due to the rotation disorder of tert-butyl groups, in all cases the

ISOR, DELU and SIMU constraints were necessary to achieve convergence. For all the clusters, the highly disordered solvent molecules in the crystal structures were removed with the SQUEEZE program in PLATON and their possible formulas were proposed based on the SQUEEZE and TGA results. A summary of the crystallographic data for the reported clusters is listed in Table S1. CCDC 2225573-2225576 contain the crystallographic data herein.

**Typical procedure for the oxidation of desulfurization.** The catalytic reactions were carried out with sulfide (0.7 mmol), catalyst (5mg, 1.09  $\mu\text{mol}$  for  $\text{Cu}_{12}\text{L}_3$ , 0.98  $\mu\text{mol}$  for  $\text{Cu}_{12}\text{L}_3\text{-Sa}$ , 0.9  $\mu\text{mol}$  for  $\text{Cu}_{16}\text{L}_4$ ),  $\text{H}_2\text{O}_2$  (30%, 200  $\mu\text{L}$ ), and 5 mL solvent. The reaction was stirred at 50 °C at a certain time. After reaction, the mixtures were analysed by gas chromatography (GC) and  $^1\text{H}$  NMR. The catalysts were collected by filtration and washed with  $\text{CH}_3\text{OH}$ , and reused for the next cycle.

**DFT calculations** were performed with Gaussian16 package.<sup>[1]</sup> B3LYP functional was used for calculations.<sup>[2-4]</sup> The Lanl2dz basis set was used to describe The effective core potentials (ECPs) of Lanl2dz used to describe Cu, Cl, S and P atoms, with polarization functions for Cu ( $\zeta_f = 0.640$ ), Cl ( $\zeta_d = 0.640$ ), S ( $\zeta_d = 0.503$ ), and P ( $\zeta_d = 0.387$ ) being added.<sup>[5-7]</sup> For all of the remaining atoms, the basis set 6-31G\* was adopted to ensure accuracy.<sup>[8,9]</sup>

Reference:

- [1] Frisch, M. J.; Trucks, G. W.; Schlegel, H. B.; Scuseria, G. E.; Robb, M. A.; Cheeseman, J. R.; Scalmani, G.; Barone, V.; Petersson, G. A.; Nakatsuji, H.; Li, X.; Caricato, M.; Marenich, A. V.; Bloino, J.; Janesko, B. G.; Gomperts, R.; Mennucci, B.; Hratchian, H. P.; Ortiz, J. V.; Izmaylov, A. F.; Sonnenberg, J. L.; Williams; Ding, F.; Lipparini, F.; Egidi, F.; Goings, J.; Peng, B.; Petrone, A.; Henderson, T.; Ranasinghe, D.; Zakrzewski, V. G.; Gao, J.; Rega, N.; Zheng, G.; Liang, W.; Hada, M.; Ehara, M.; Toyota, K.; Fukuda, R.; Hasegawa, J.; Ishida, M.; Nakajima, T.; Honda, Y.; Kitao, O.; Nakai, H.; Vreven, T.; Throssell, K.; Montgomery Jr., J. A.; Peralta, J. E.; Ogliaro, F.; Bearpark, M. J.; Heyd, J. J.; Brothers, E. N.; Kudin, K. N.; Staroverov, V. N.; Keith, T. A.; Kobayashi, R.; Normand, J.; Raghavachari, K.; Rendell, A. P.; Burant, J. C.; Iyengar, S. S.; Tomasi, J.; Cossi, M.; Millam, J. M.; Klene, M.; Adamo, C.; Cammi, R.; Ochterski, J. W.; Martin, R. L.; Morokuma, K.; Farkas, O.; Foresman, J. B.; Fox, D. J.: Gaussian 16 Rev. C.01. Wallingford, CT, 2016
- [2] Michlich, B.; Savin, A.; Stoll, H.; Preuss, H. Results obtained with the correlation energy density functionals of becke and Lee, Yang and Parr. *Chem. Phys. Lett.* **1989**, *157*, 200-206.
- [3] Lee, C.; Yang, W.; Parr, R. G. Development of the Colle-Salvetti correlation-energy formula into a functional of the electron density. *Physical Review B* **1988**, *37*, 785-789.
- [4] Becke, A. D. Density-functional thermochemistry. III. The role of exact exchange. *The Journal of Chemical Physics* **1993**, *98*, 5648-5652.
- [5] Hay, P. J.; Wadt, W. R. Ab initio effective core potentials for molecular calculations. Potentials for K to Au including the outermost core orbitals. *The Journal of Chemical Physics* **1985**, *82*, 299-310.
- [6] Wadt, W. R.; Hay, P. J. Ab initio effective core potentials for molecular calculations. Potentials for main group elements Na to Bi. *The Journal of Chemical Physics* **1985**, *82*, 284-298.
- [7] Hay, P. J.; Wadt, W. R. Ab initio effective core potentials for molecular calculations. Potentials for the transition metal atoms Sc to Hg. *The Journal of Chemical Physics* **1985**, *82*, 270-283.
- [8] Krishnan, R.; Binkley, J. S.; Seeger, R.; Pople, J. A. Self-consistent molecular orbital methods. XX. A basis set for correlated wave functions. *The Journal of Chemical Physics* **1980**, *72*, 650-654.
- [9] McLean, A. D.; Chandler, G. S. Contracted Gaussian basis sets for molecular calculations. I. Second row atoms, Z=11-18. *The Journal of Chemical Physics* **1980**, *72*, 5639-5648.

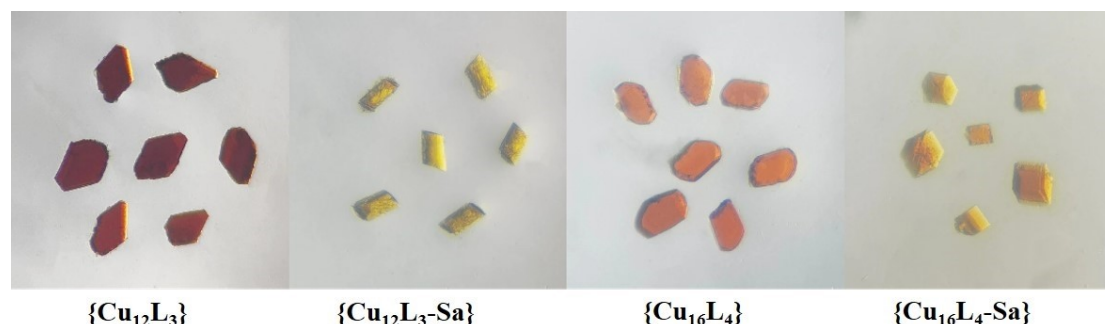

**Figure S1.** Pictures of fresh crystals separated from the solution.

## 2. Structure of Compounds

| Compounds                                                 | <b>Cu<sub>12</sub>L<sub>3</sub></b>                                                                                                  | <b>Cu<sub>12</sub>L<sub>3</sub>-Sa</b>                                                                     | <b>Cu<sub>16</sub>L<sub>4</sub></b>                                                                                                 | <b>Cu<sub>16</sub>L<sub>4</sub>-Sa</b>                                                                               |
|-----------------------------------------------------------|--------------------------------------------------------------------------------------------------------------------------------------|------------------------------------------------------------------------------------------------------------|-------------------------------------------------------------------------------------------------------------------------------------|----------------------------------------------------------------------------------------------------------------------|
| CCDC                                                      | <b>2225573</b>                                                                                                                       | <b>2225574</b>                                                                                             | <b>2225575</b>                                                                                                                      | <b>2225576</b>                                                                                                       |
| Formula                                                   | C <sub>183</sub> H <sub>225</sub><br>O <sub>41</sub> Cl <sub>3</sub> Cu <sub>12</sub> Na <sub>2</sub> P <sub>6</sub> S <sub>12</sub> | C <sub>212.5</sub> H <sub>269.5</sub> Cu <sub>12</sub> O <sub>53.5</sub><br>P <sub>8</sub> S <sub>12</sub> | C <sub>220</sub> H <sub>242</sub> Cl <sub>3</sub> Cu <sub>16</sub> N <sub>4</sub><br>O <sub>44</sub> P <sub>8</sub> S <sub>16</sub> | C <sub>216</sub> H <sub>238</sub> Cl <sub>4</sub> Cu <sub>16</sub> O <sub>46</sub><br>P <sub>6</sub> S <sub>16</sub> |
| T(K)                                                      | 150                                                                                                                                  | 150                                                                                                        | 150                                                                                                                                 | 150                                                                                                                  |
| <i>F<sub>w</sub></i>                                      | 4565.97                                                                                                                              | 5074.73                                                                                                    | 5536.07                                                                                                                             | 5483.49                                                                                                              |
| Crystal system                                            | triclinic                                                                                                                            | monoclinic                                                                                                 | monoclinic                                                                                                                          | triclinic                                                                                                            |
| Space group                                               | P-1                                                                                                                                  | P2 <sub>1</sub> /n                                                                                         | P2 <sub>1</sub> /n                                                                                                                  | P-1                                                                                                                  |
| <i>a</i> , Å                                              | 17.190(3)                                                                                                                            | 13.44160(10)                                                                                               | 17.160(2)                                                                                                                           | 17.1459(11)                                                                                                          |
| <i>b</i> , Å                                              | 25.858(6)                                                                                                                            | 64.1367(5)                                                                                                 | 33.513(5)                                                                                                                           | 20.4847(15)                                                                                                          |
| <i>c</i> , Å                                              | 28.437(6)                                                                                                                            | 25.1780(2)                                                                                                 | 22.472(3)                                                                                                                           | 22.6894(14)                                                                                                          |
| <i>α</i> <sup>o</sup>                                     | 66.779(6)                                                                                                                            | 90                                                                                                         | 90                                                                                                                                  | 74.314(2)                                                                                                            |
| <i>β</i> <sup>o</sup>                                     | 89.744(5)                                                                                                                            | 103.1780(10)                                                                                               | 96.721(6)                                                                                                                           | 68.612(2)                                                                                                            |
| <i>γ</i> <sup>o</sup>                                     | 77.581(6)                                                                                                                            | 90                                                                                                         | 90                                                                                                                                  | 75.244(2)                                                                                                            |
| <i>V</i> /Å <sup>3</sup>                                  | 11299(4)                                                                                                                             | 21134.4(3)                                                                                                 | 12834(3)                                                                                                                            | 7034.9(8)                                                                                                            |
| <i>Z</i>                                                  | 2                                                                                                                                    | 4                                                                                                          | 2                                                                                                                                   | 1                                                                                                                    |
| <i>ρ</i> <sub>calcd</sub> /gcm <sup>-3</sup>              | 1.186                                                                                                                                | 1.595                                                                                                      | 1.440                                                                                                                               | 1.294                                                                                                                |
| <i>μ</i> /mm <sup>-1</sup>                                | 7.448                                                                                                                                | 3.631                                                                                                      | 8.733                                                                                                                               | 7.896                                                                                                                |
| <i>F</i> (000)                                            | 4114.0                                                                                                                               | 10530.0                                                                                                    | 5700                                                                                                                                | 2808.0                                                                                                               |
| Radiation                                                 | GaKα (λ = 1.34139)                                                                                                                   | Cu Kα (λ = 1.54184)                                                                                        | GaKα (λ = 1.34139)                                                                                                                  | GaKα (λ = 1.34139)                                                                                                   |
| Data/restraints/parameters                                | 36208/592/1979                                                                                                                       | 37280/2383/2880                                                                                            | 27914/190/1481                                                                                                                      | 23140/424/1411                                                                                                       |
| 2θ range for data collection/ <sup>o</sup>                | 8.3 to 102.876                                                                                                                       | 4.538 to 133.202                                                                                           | 5.738 to 118.822                                                                                                                    | 5.114 to 102.866                                                                                                     |
| Goof                                                      | 0.970                                                                                                                                | 1.050                                                                                                      | 1.058                                                                                                                               | 0.975                                                                                                                |
| <i>R</i> <sub>1</sub> / <i>wR</i> <sub>2</sub> (I> 2σ(I)) | 0.1116/0.3019                                                                                                                        | 0.0827/0.2235                                                                                              | 0.0664/0.1980                                                                                                                       | 0.0781/0.2132                                                                                                        |
| <i>R</i> <sub>1</sub> / <i>wR</i> <sub>2</sub> (all data) | 0.1720/0.3462                                                                                                                        | 0.1033/0.2383                                                                                              | 0.0827/0.2097                                                                                                                       | 0.1350/0.2457                                                                                                        |

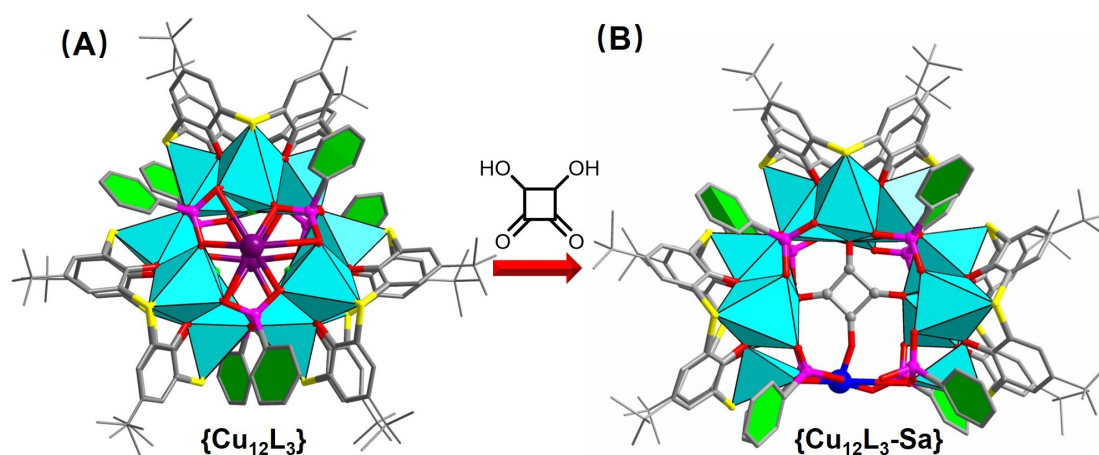

**Figure S2.** Structure of **Cu<sub>12</sub>L<sub>3</sub>** and **Cu<sub>12</sub>L<sub>3</sub>-Sa**.

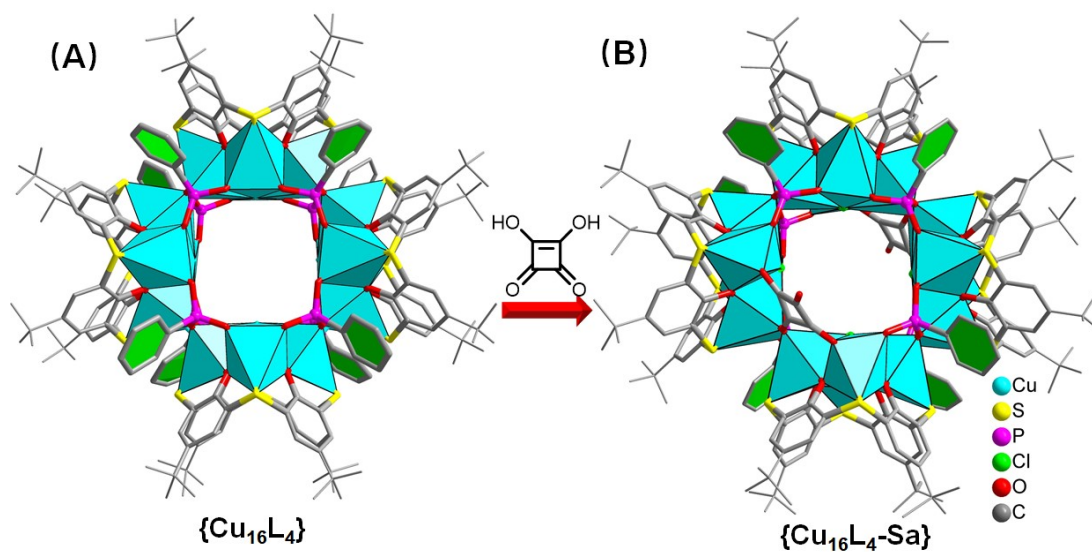

**Figure S3.** Structure of  $\text{Cu}_{16}\text{L}_4$  and  $\text{Cu}_{16}\text{L}_4\text{-Sa}$ .

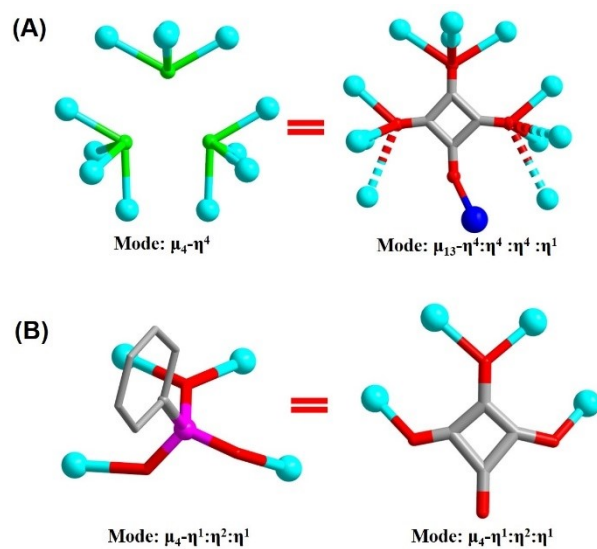

**Figure S4.** Coordination modes of ligands of  $\text{Cl}^-$ ,  $\text{Sa}^{2-}$  and  $\text{PhPO}_3^{2-}$  ligands.

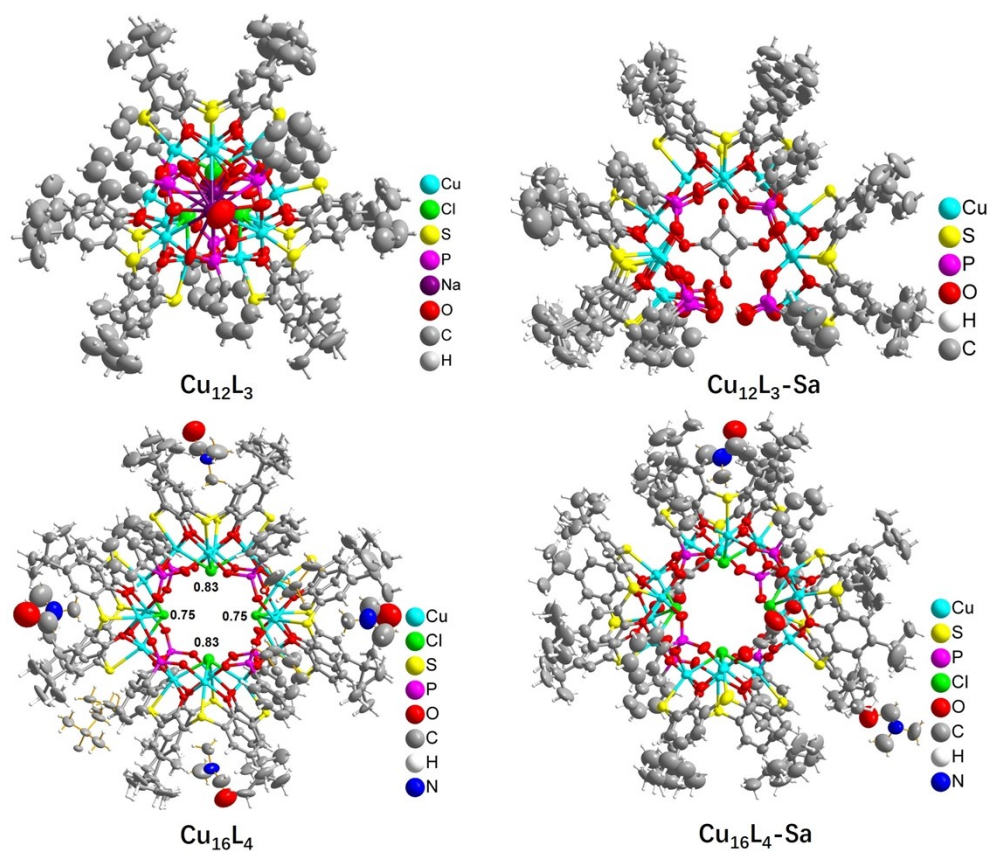

Figure S5. ORTEP representation of the structures.

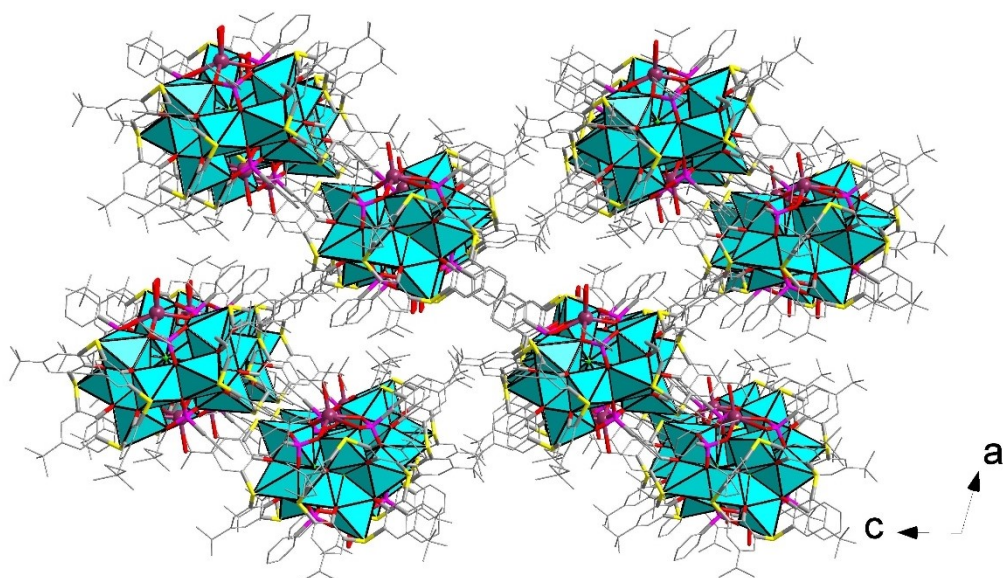

Figure S6. Three-dimensional packing structure of  $\text{Cu}_{12}\text{L}_3$ .

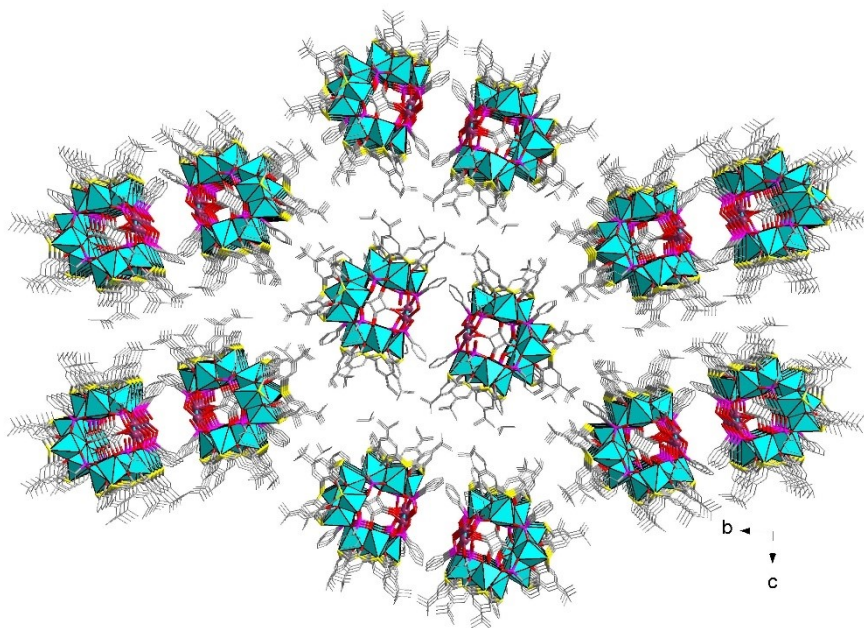

**Figure S7.** Three-dimensional packing structure of  $\text{Cu}_{12}\text{L}_3\text{-Sa}$ .

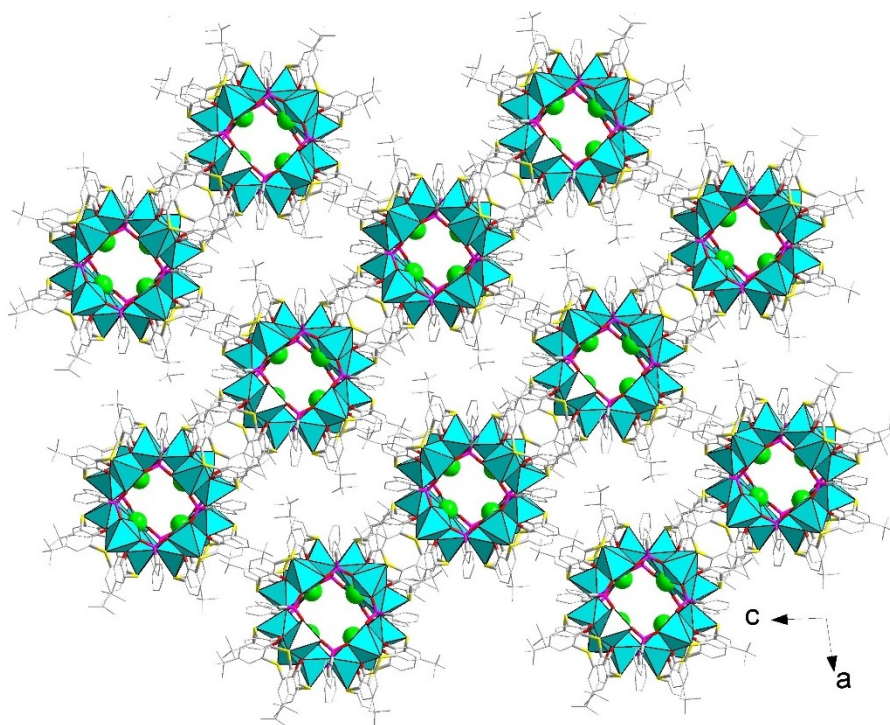

**Figure S8.** Three-dimensional packing structure of  $\text{Cu}_{16}\text{L}_4$ .

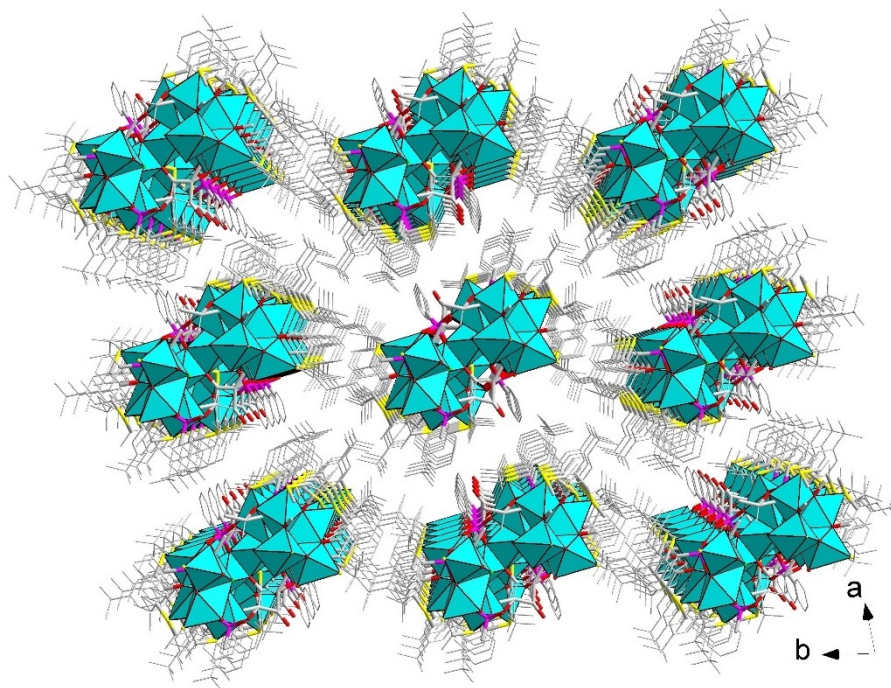

Figure S9. Three-dimensional packing structure of  $\text{Cu}_{16}\text{L}_4\text{.Sa}$ .

### 3. Powder X-ray Diffraction

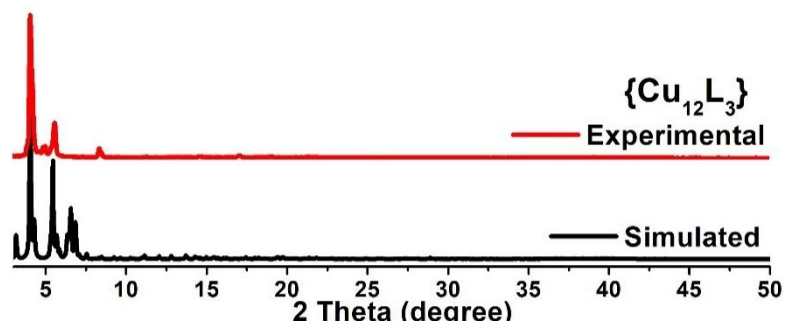

Figure S10. The XRD patterns of  $\text{Cu}_{12}\text{L}_3$ .

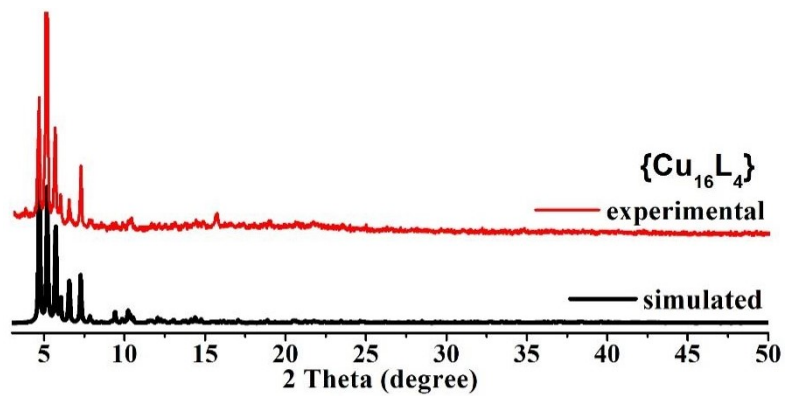

Figure S11. The XRD pattern of  $\text{Cu}_{16}\text{L}_4$ .

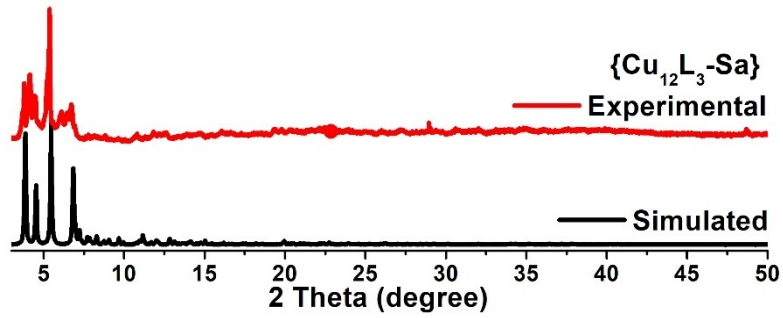

Figure S12. The XRD pattern of Cu<sub>12</sub>L<sub>3</sub>-Sa.

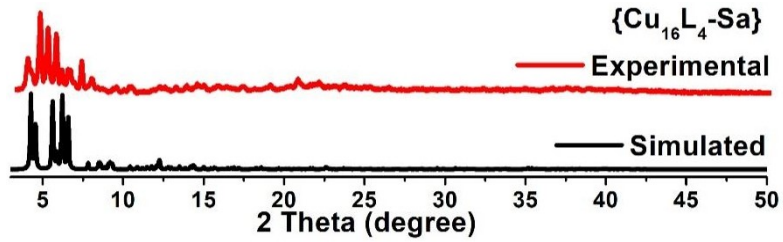

Figure S13. The XRD patterns of Cu<sub>16</sub>L<sub>4</sub>-Sa.

## 6. Energy Dispersive X-ray (EDX) Spectroscopic Analysis

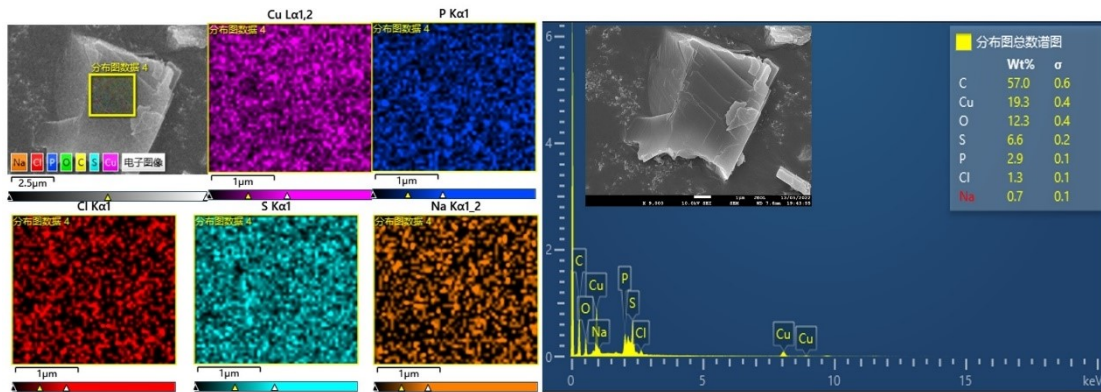

Figure S14. The EDS pattern of Cu<sub>12</sub>L<sub>3</sub>.

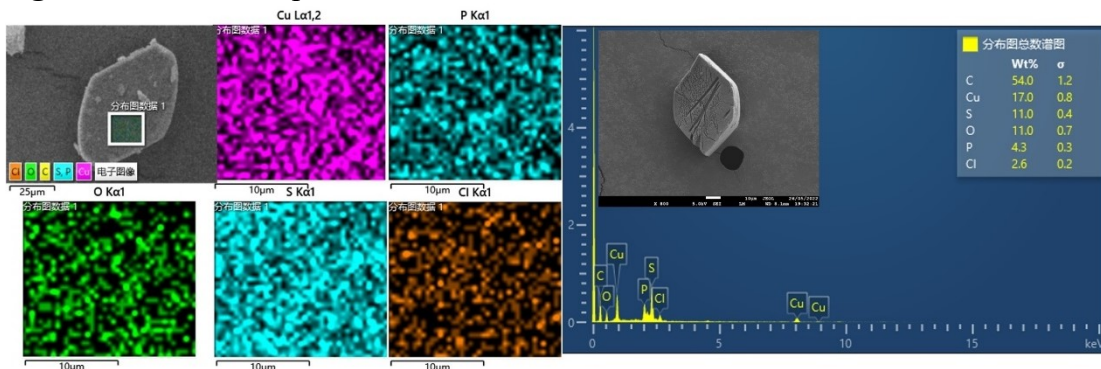

Figure S15. The EDS pattern of Cu<sub>16</sub>L<sub>4</sub>.



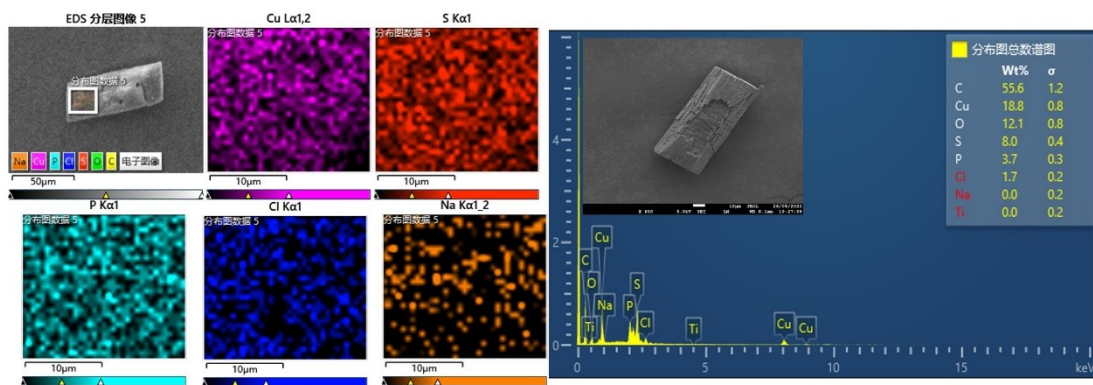

Figure S16. The EDS pattern of  $\text{Cu}_{12}\text{L}_3\text{-Sa}$ .

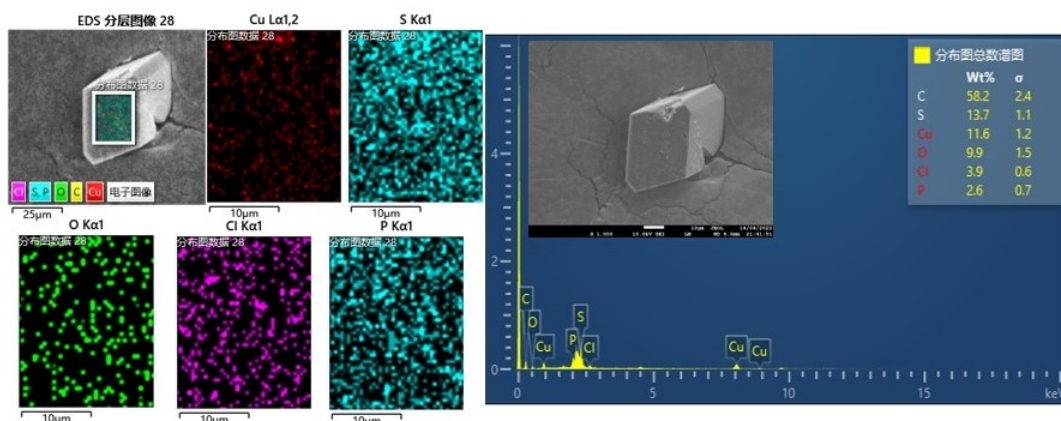

Figure S17. The EDS pattern of  $\text{Cu}_{16}\text{L}_4\text{-Sa}$ .

## 7. TG-Measurement

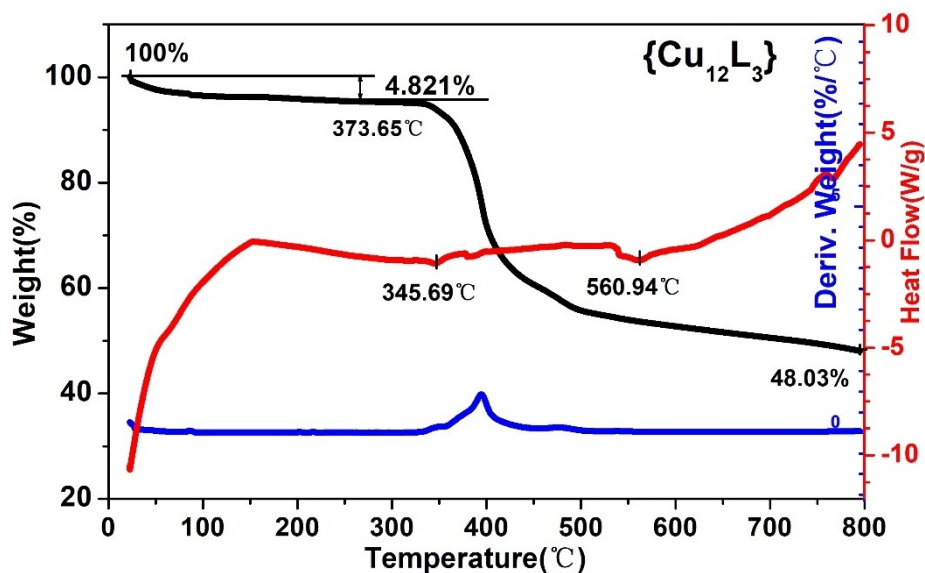

Figure S18. The TGA and DSC curves of  $\text{Cu}_{12}\text{L}_3$ .

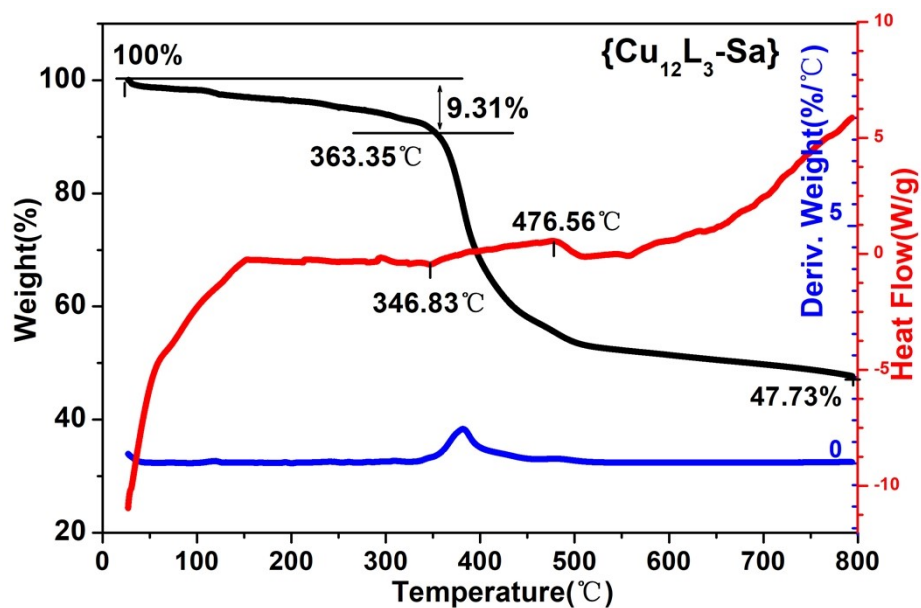

Figure S19. The TGA and DSC curves of Cu<sub>12</sub>L<sub>3</sub>-Sa.

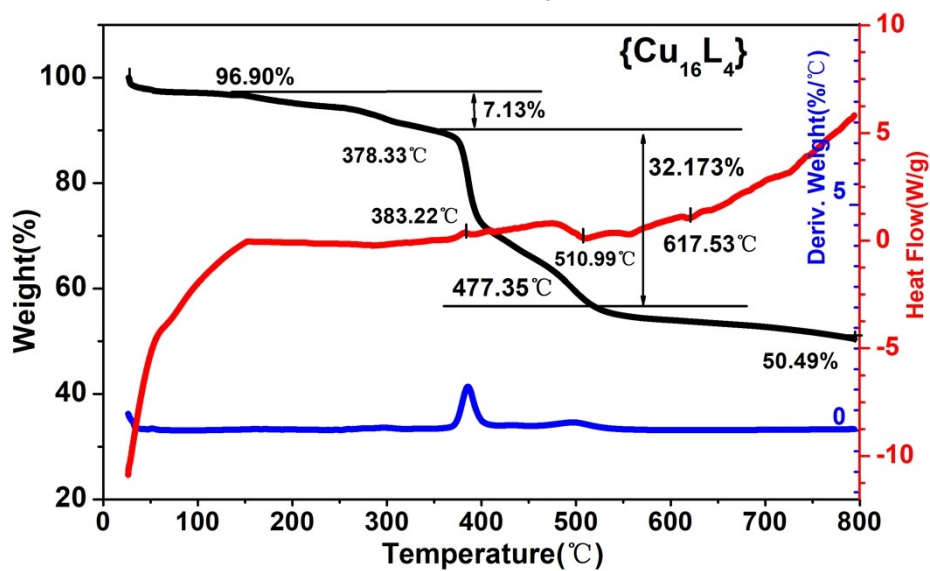

Figure S20. The TGA and DSC curves of Cu<sub>16</sub>L<sub>4</sub>.

## 8. IR Spectra

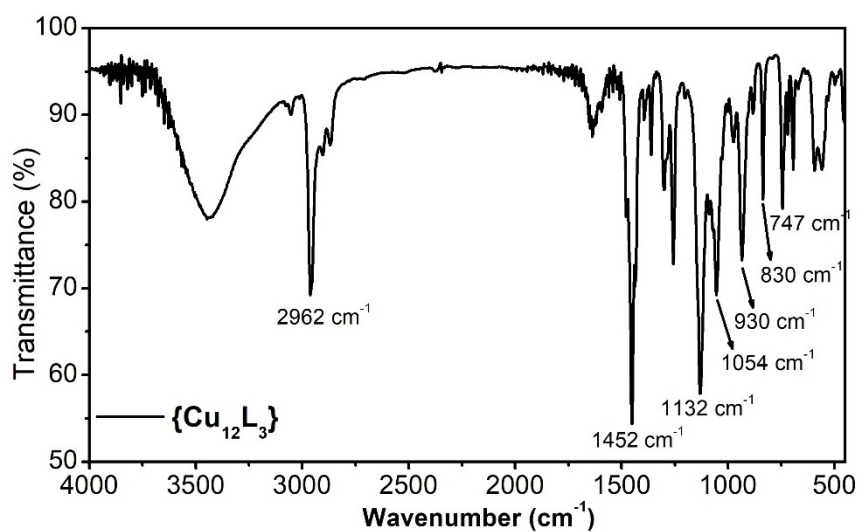

Figure S21. IR spectrum of crystal sample of  $\text{Cu}_{12}\text{L}_3$ .

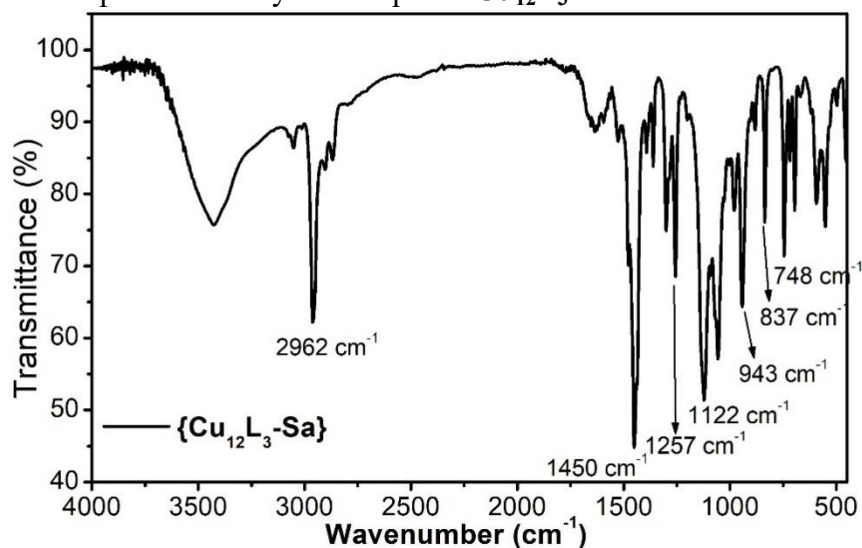

Figure S22. IR spectrum of crystal sample of  $\text{Cu}_{12}\text{L}_3\text{-Sa}$ .

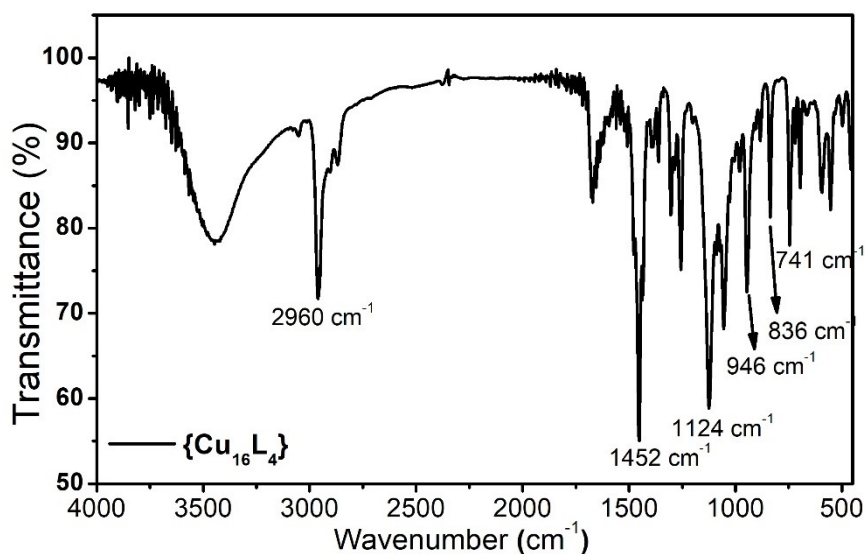

Figure S23. IR spectrum of crystal sample of  $\text{Cu}_{16}\text{L}_4$ .

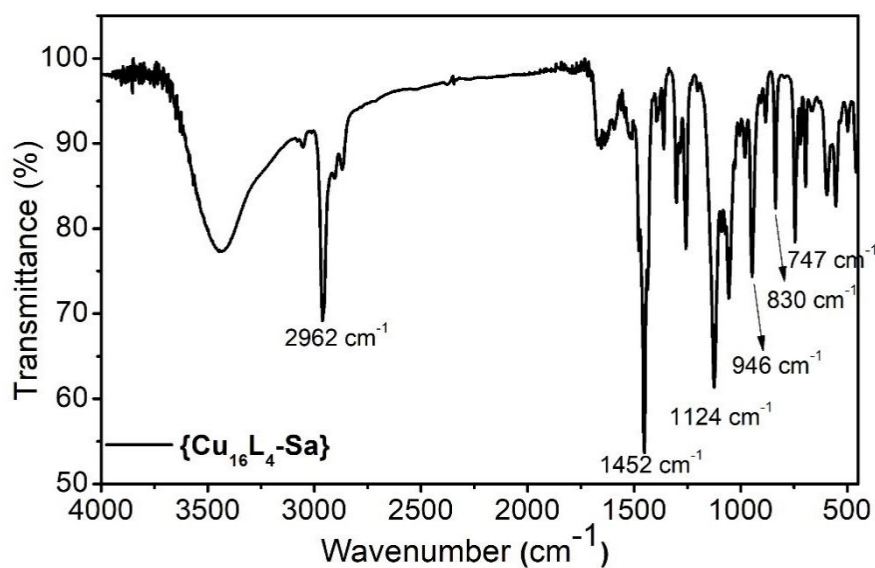

Figure S24. IR spectrum of crystal sample of  $\text{Cu}_{16}\text{L}_4\text{-Sa}$ .

### 9. ESI-MS Measurements.

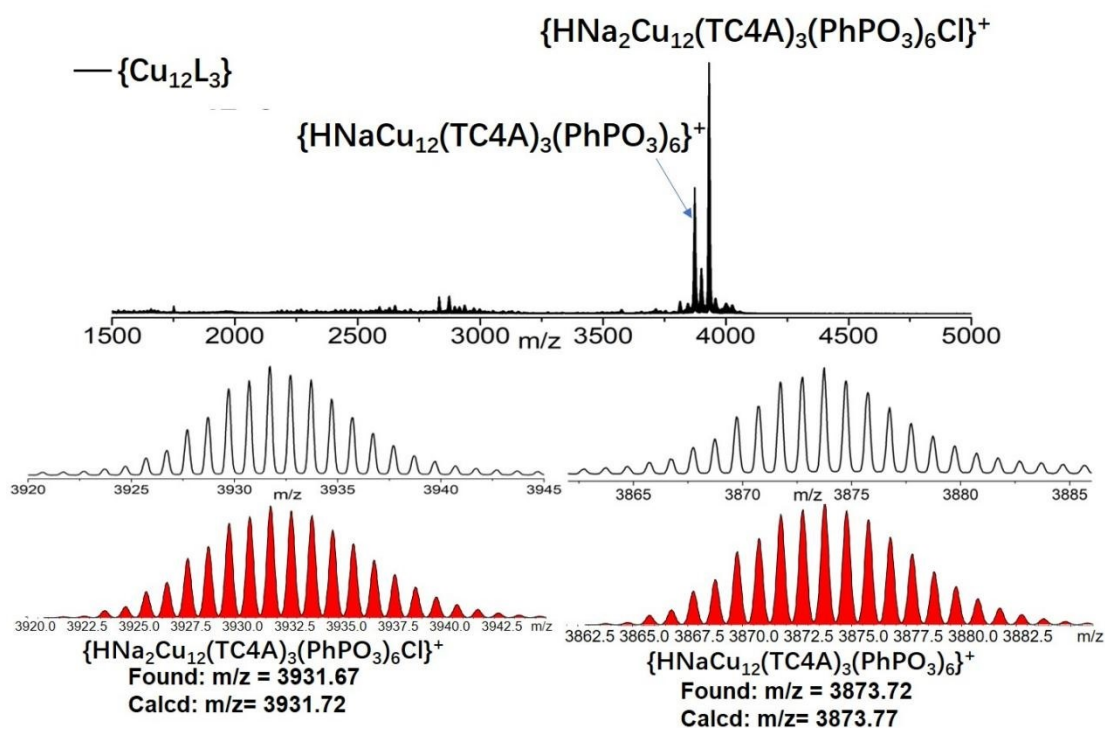

Figure S25. ESI-MS spectrum of the  $\text{CH}_2\text{Cl}_2$  solution of  $\text{Cu}_{12}\text{L}_3$ .

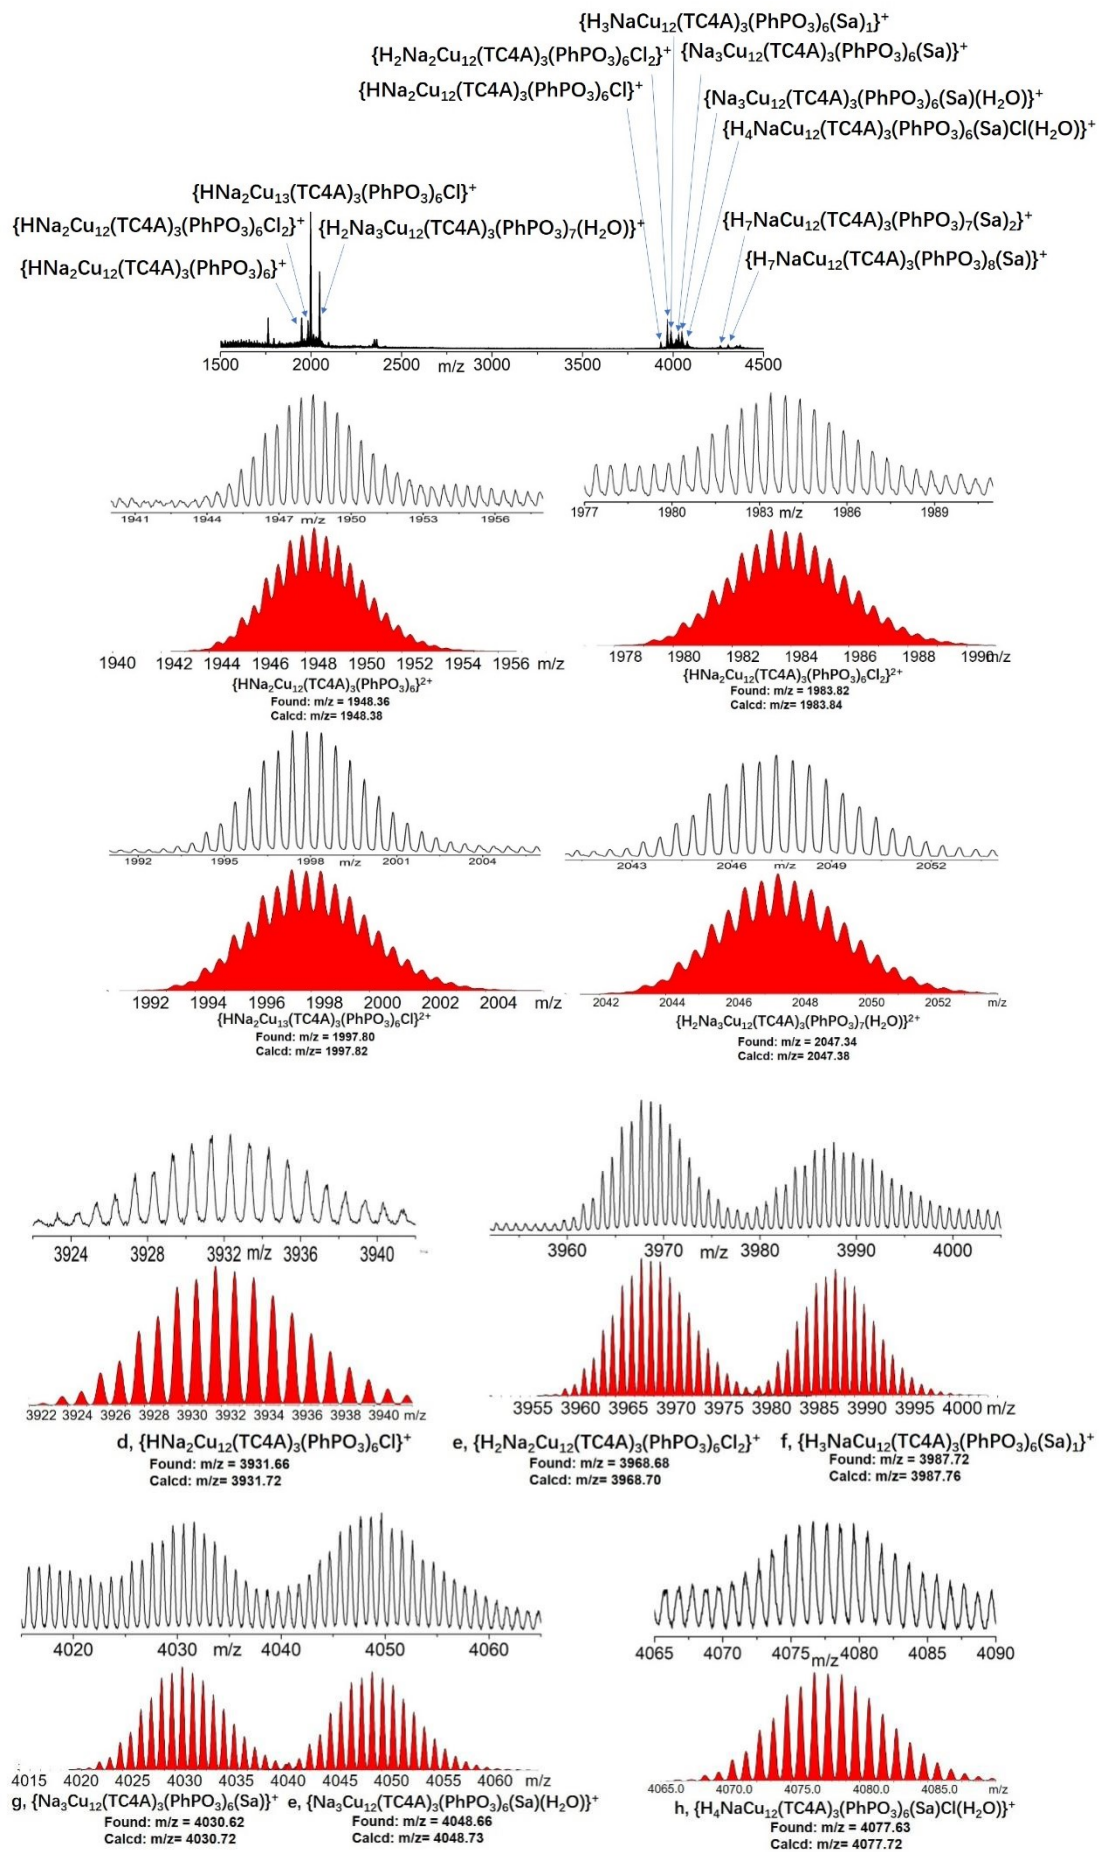

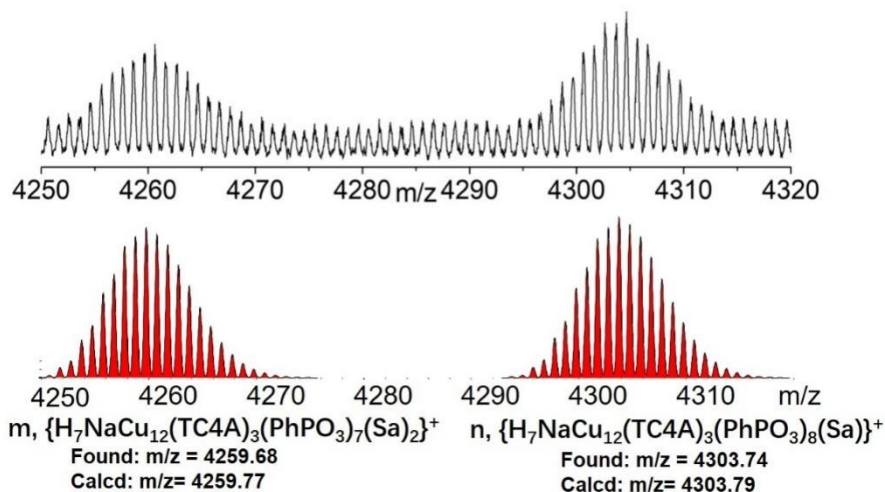

**Figure S26.** ESI-MS of reaction mixture of  $Cu_{12}L_3$  and  $SaH_2$  in  $iPrOH/CH_2Cl_2$  solution.

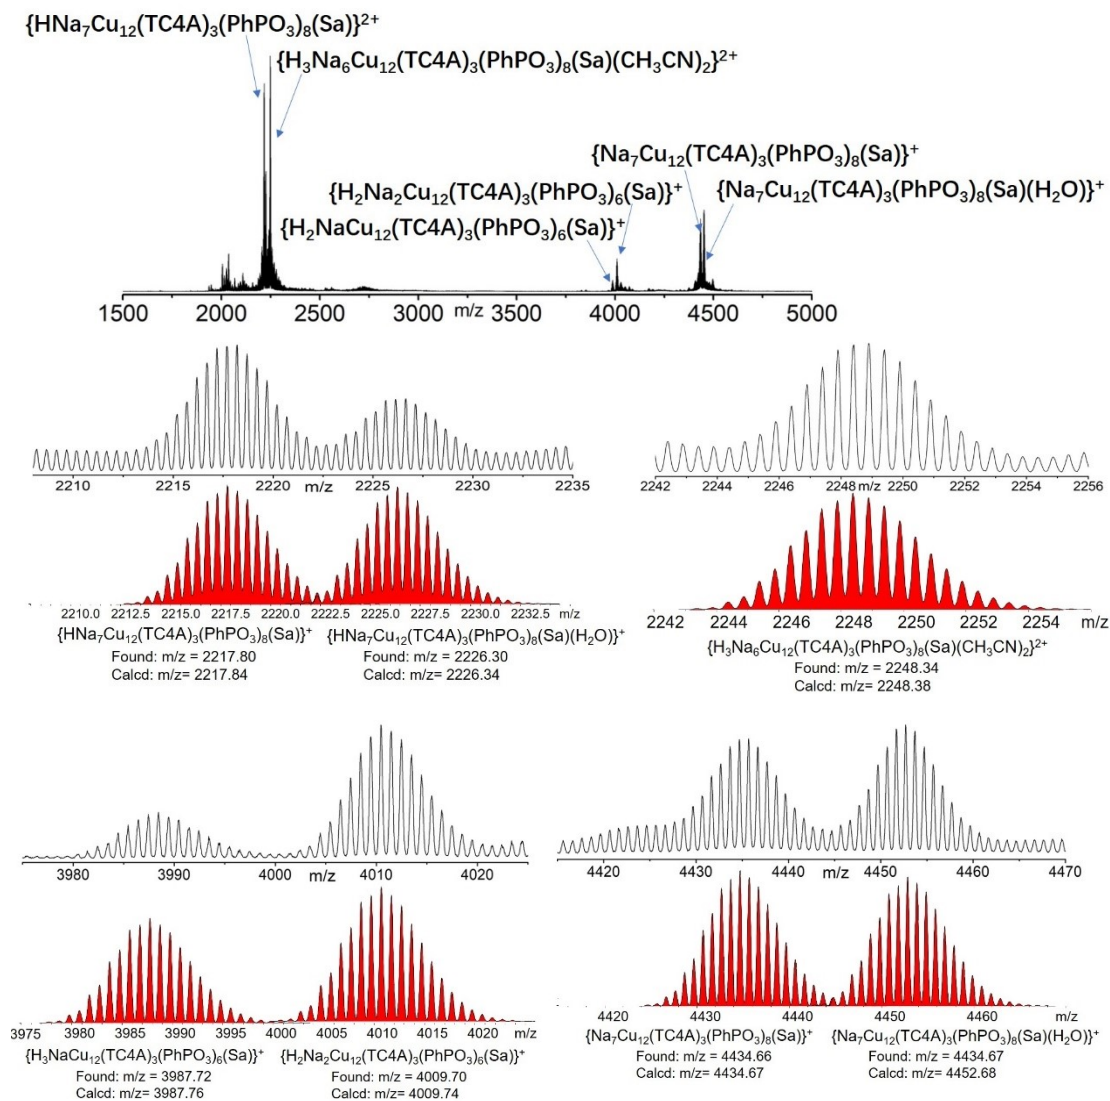

**Figure S27.** ESI-MS of  $CH_2Cl_2$  solution of  $Cu_{12}L_3$ -Sa.

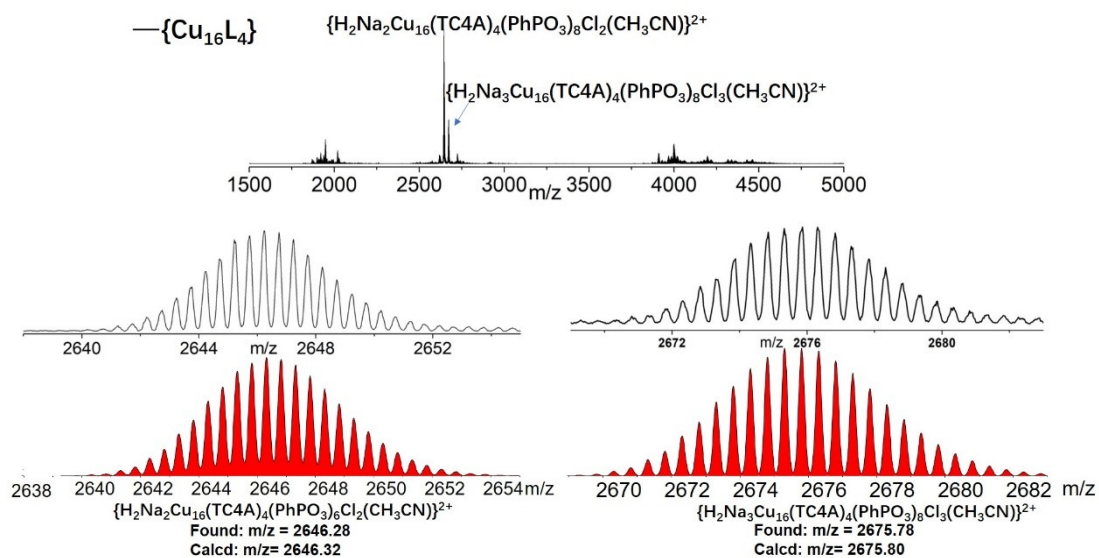

**Figure S28.** ESI-MS of  $\text{CH}_2\text{Cl}_2$  solution of  $\text{Cu}_{16}\text{L}_4$ .

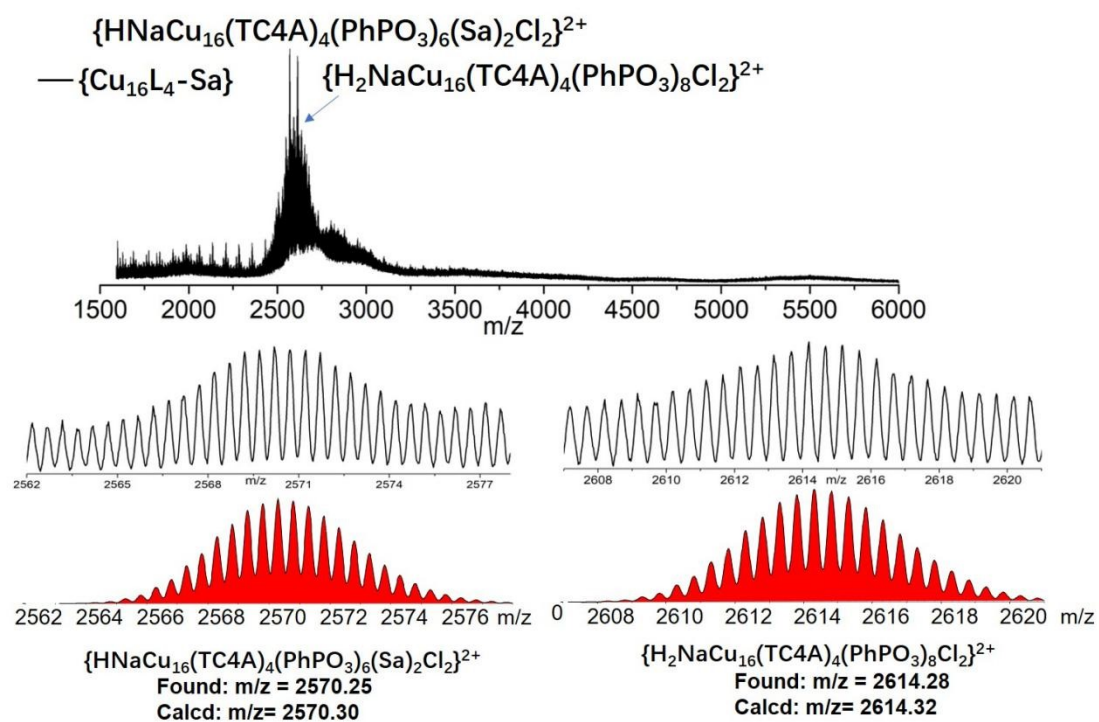

**Figure S29.** ESI-MS spectrum of the  $\text{CH}_2\text{Cl}_2$  solution of  $\text{Cu}_{16}\text{L}_4\text{-Sa}$ .

## 10. Solid UV-Vis absorption spectra.

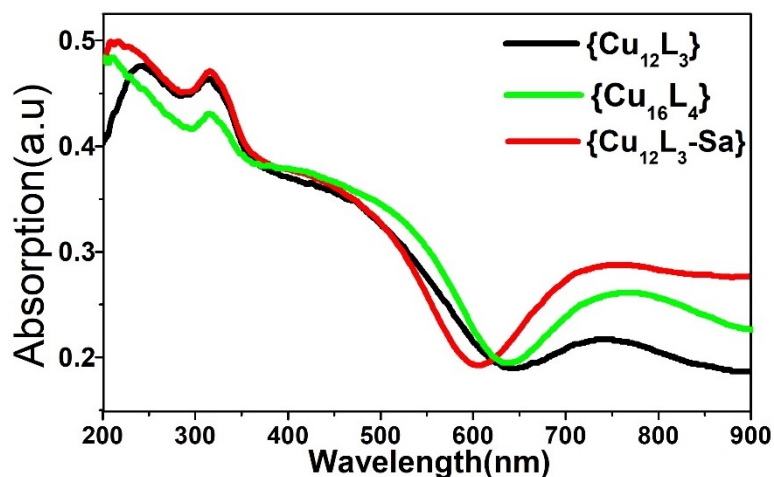

Figure S30. The solid UV-Vis absorption spectra of the clusters.

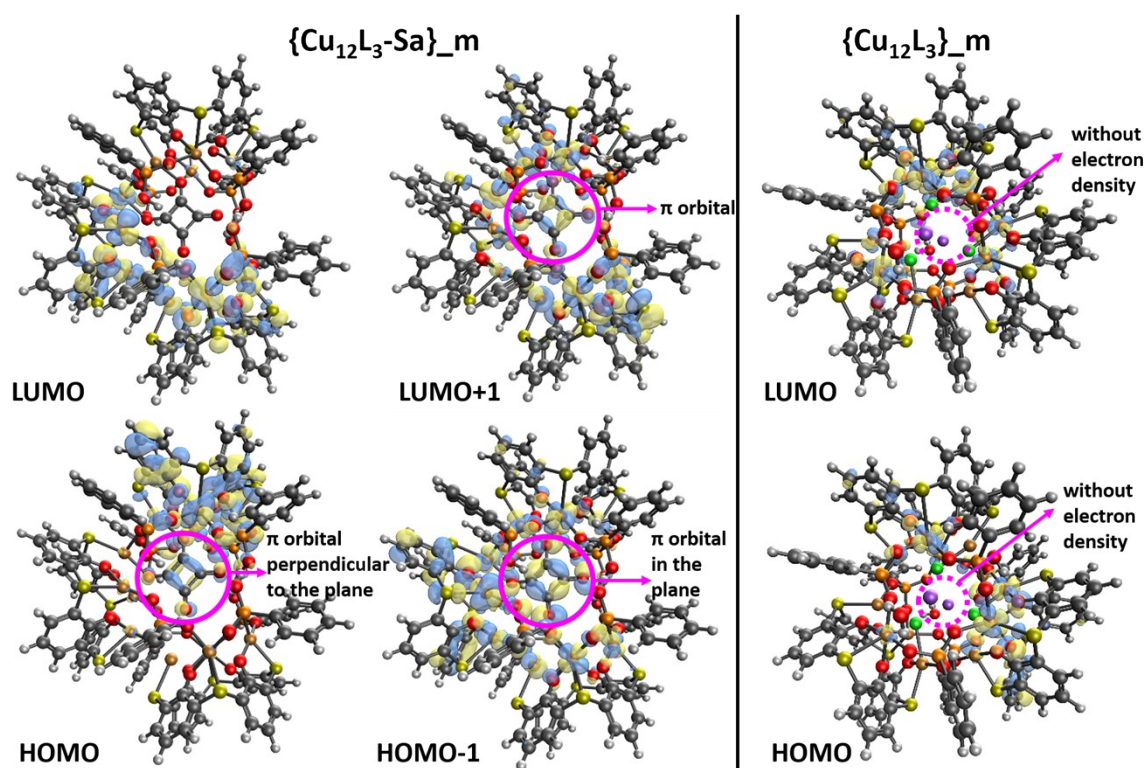

Figure S31. Related frontier molecular orbitals of  $\{\text{Cu}_{12}\text{L}_3\}_m$  and  $\{\text{Cu}_{12}\text{L}_3\text{-Sa}\}_m$ .

## 11. Selective Sulfide Oxidation.

Table S2. Catalytic oxidation of phenyl methyl sulfide<sup>a</sup>

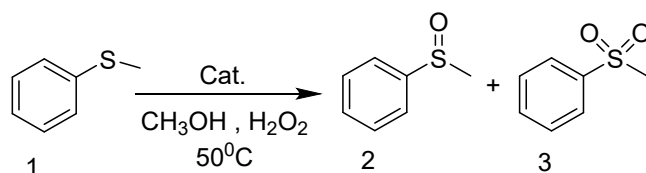

| Entry | Cat.                       | Oxidant                | Solvent                      | Temp.(°C) | Time(h) | Conv.(%) <sup>c</sup> | Set.(%) <sup>d</sup> |
|-------|----------------------------|------------------------|------------------------------|-----------|---------|-----------------------|----------------------|
| 1     | $\text{Cu}_{16}\text{L}_4$ | $\text{H}_2\text{O}_2$ | 200uL $\text{CH}_3\text{OH}$ | 50        | 1h      | 100                   | 99                   |
| 2     | $\text{Cu}_{16}\text{L}_4$ | $\text{H}_2\text{O}_2$ | 180uL $\text{CH}_3\text{OH}$ | 50        | 1h      | 88                    | 99                   |



|    |                                                      |                               |       |                    |      |    |    |    |
|----|------------------------------------------------------|-------------------------------|-------|--------------------|------|----|----|----|
| 3  | <b>Cu<sub>16</sub>L<sub>4</sub></b>                  | H <sub>2</sub> O <sub>2</sub> | 150uL | CH <sub>3</sub> OH | 50   | 1h | 80 | 99 |
| 4  | <b>Cu<sub>16</sub>L<sub>4</sub></b>                  | H <sub>2</sub> O <sub>2</sub> | 100uL | CH <sub>3</sub> OH | 50   | 1h | 58 | 99 |
| 5  | <b>Cu<sub>16</sub>L<sub>4</sub></b>                  | H <sub>2</sub> O <sub>2</sub> | 200uL | CH <sub>3</sub> OH | 40   | 1h | 58 | 99 |
| 6  | <b>Cu<sub>16</sub>L<sub>4</sub></b>                  | H <sub>2</sub> O <sub>2</sub> | 200uL | CH <sub>3</sub> OH | R.T. | 1h | 20 | 99 |
| 7  | <b>Cu<sub>16</sub>L<sub>4</sub></b>                  | H <sub>2</sub> O <sub>2</sub> | 200uL | CH <sub>3</sub> CN | 50   | 1h | 57 | 77 |
| 8  | <b>Cu<sub>16</sub>L<sub>4</sub></b>                  | TBHP <sup>b</sup>             | 200uL | CH <sub>3</sub> OH | 50   | 1h | 37 | 97 |
| 9  | <b>Cu<sub>16</sub>L<sub>4</sub></b>                  | TBHP                          | 200uL | CH <sub>3</sub> CN | 50   | 1h | 40 | 99 |
| 10 | <b>TC4A<sup>c</sup></b>                              | H <sub>2</sub> O <sub>2</sub> | 200uL | CH <sub>3</sub> OH | 50   | 1h | 20 | 99 |
| 11 | <b>PhPO<sub>3</sub>H<sub>2</sub></b>                 | H <sub>2</sub> O <sub>2</sub> | 200uL | CH <sub>3</sub> OH | 50   | 1h | 26 | 99 |
| 12 | <b>CuCl</b>                                          | H <sub>2</sub> O <sub>2</sub> | 200uL | CH <sub>3</sub> OH | 50   | 1h | 24 | 99 |
| 13 | <b>TC4A+PhPO<sub>3</sub>H<sub>2</sub><br/>+ CuCl</b> | H <sub>2</sub> O <sub>2</sub> | 200uL | CH <sub>3</sub> OH | 50   | 1h | 44 | 99 |
| 14 | <b>none</b>                                          | H <sub>2</sub> O <sub>2</sub> | 200uL | CH <sub>3</sub> OH | 50   | 1h | 20 | 99 |
| 15 | <b>Cu<sub>16</sub>L<sub>4</sub></b>                  | none                          |       | CH <sub>3</sub> OH | 50   | 1h | 0  | -  |

<sup>a</sup> Reaction conditions: phenyl methyl sulfide (0.7 mmol), catalyst (0.01 mmol%), oxidation (200 μL);

<sup>b</sup> TBHP = tert-butyl hydroperoxide;

<sup>c</sup> conversion and selectivity were detected by <sup>1</sup>H NMR and GC;

<sup>d</sup> selectivity = 2/(2+3);

<sup>e</sup> TC4A=4-tert-butylthiacalix[4]arene

**Table S3.** Oxidative desulfurization of sulfide to sulfoxidea

$$R_1-S-R_2 \xrightarrow[\text{Oxidation}]{\text{Cat.}} R_1-S(=O)-R_2 + R_1-S(=O)_2-R_2$$

| Entry | Sulfide | Sulfoxide | Time | Cat.                                | Conv(%). <sup>b</sup> | Sel(%). <sup>c</sup> |
|-------|---------|-----------|------|-------------------------------------|-----------------------|----------------------|
| 1     |         |           | 1 h  | Cu <sub>12</sub> L <sub>3</sub>     | 76.8                  | 99                   |
|       |         |           |      | Cu <sub>12</sub> L <sub>3</sub> -Sa | 78.3                  | 99                   |
|       |         |           |      | Cu <sub>16</sub> L <sub>4</sub>     | 100                   | 99                   |
| 2     |         |           | 1h   | Cu <sub>12</sub> L <sub>3</sub>     | 74                    | 100                  |
|       |         |           |      | Cu <sub>12</sub> L <sub>3</sub> -Sa | 74                    | 100                  |
|       |         |           |      | Cu <sub>16</sub> L <sub>4</sub>     | 100                   | 90                   |
| 3     |         |           | 1h   | Cu <sub>12</sub> L <sub>3</sub>     | 56                    | 99                   |
|       |         |           |      | Cu <sub>12</sub> L <sub>3</sub> -Sa | 54                    | 99                   |
|       |         |           |      | Cu <sub>16</sub> L <sub>4</sub>     | 100                   | 99                   |
| 4     |         |           | 1h   | Cu <sub>12</sub> L <sub>3</sub>     | 58.27                 | 99                   |
|       |         |           |      | Cu <sub>12</sub> L <sub>3</sub> -Sa | 71.9                  | 99                   |
|       |         |           |      | Cu <sub>16</sub> L <sub>4</sub>     | 100                   | 93.5                 |
| 5     |         |           | 1h   | Cu <sub>12</sub> L <sub>3</sub>     | 79                    | 99                   |
|       |         |           |      | Cu <sub>12</sub> L <sub>3</sub> -Sa | 70                    | 99                   |
|       |         |           |      | Cu <sub>16</sub> L <sub>4</sub>     | 100                   | 95                   |
| 6     |         |           | 4h   | Cu <sub>12</sub> L <sub>3</sub>     | 39                    | 99                   |
|       |         |           |      | Cu <sub>12</sub> L <sub>3</sub> -Sa | 63.9                  | 99                   |

|   |                                                                                   |       |                                     |      |    |
|---|-----------------------------------------------------------------------------------|-------|-------------------------------------|------|----|
|   |                                                                                   |       | Cu <sub>16</sub> L <sub>4</sub>     | 96   | 99 |
| 7 | 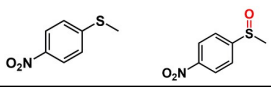 | 2h    | Cu <sub>12</sub> L <sub>3</sub>     | 31.5 | 99 |
|   |                                                                                   |       | Cu <sub>12</sub> L <sub>3</sub> -Sa | 23.8 | 99 |
|   |                                                                                   |       | Cu <sub>16</sub> L <sub>4</sub>     | 100  | 99 |
| 8 |  | 0.25h | Cu <sub>12</sub> L <sub>3</sub>     | 50   | 99 |
|   |                                                                                   |       | Cu <sub>12</sub> L <sub>3</sub> -Sa | 52   | 99 |
|   |                                                                                   |       | Cu <sub>16</sub> L <sub>4</sub>     | 100  | 99 |
| 9 |  | 0.75h | Cu <sub>12</sub> L <sub>3</sub>     | 73   | 99 |
|   |                                                                                   |       | Cu <sub>12</sub> L <sub>3</sub> -Sa | 77   | 99 |
|   |                                                                                   |       | Cu <sub>16</sub> L <sub>4</sub>     | 100  | 99 |

[a] Reaction conditions: sulfide (0.7 mmol), catalyst (0.01 mmol%), oxidation (200  $\mu$ L).

[b] conversion and selectivity were detected by <sup>1</sup>H NMR and GC.

[c] selectivity = 2/(2+3)

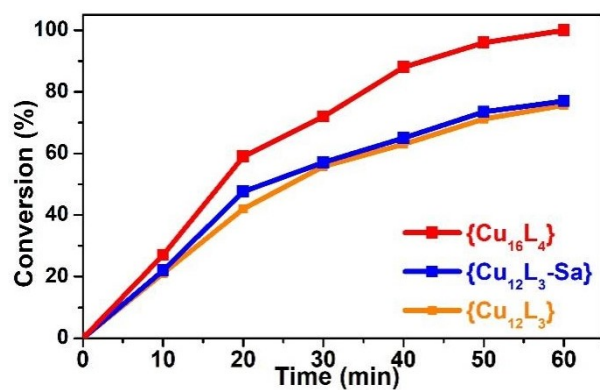

**Figure S32.** Time-conversion plot for the selective sulfide oxidation.

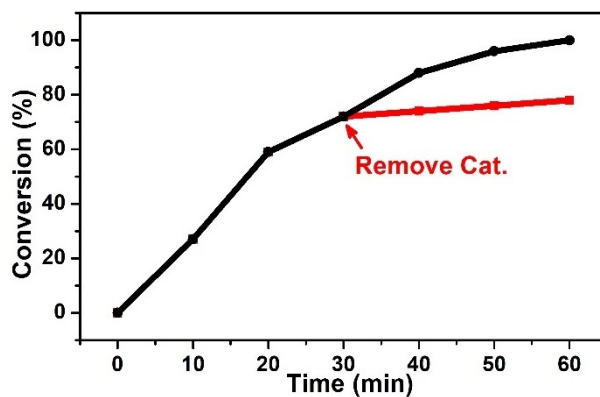

**Figure S33.** Time tracking and hot-filtration tests.

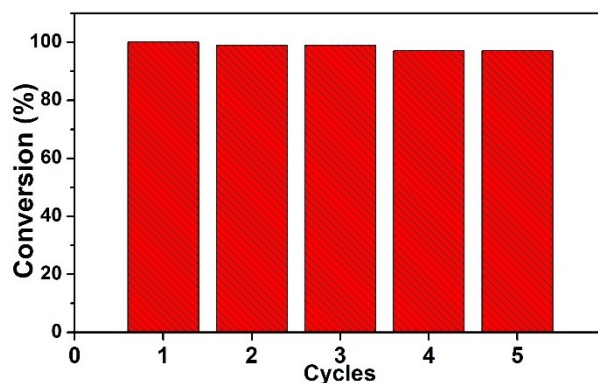

Figure S34. Recycling experiments of  $\text{Cu}_{16}\text{L}_4$ .

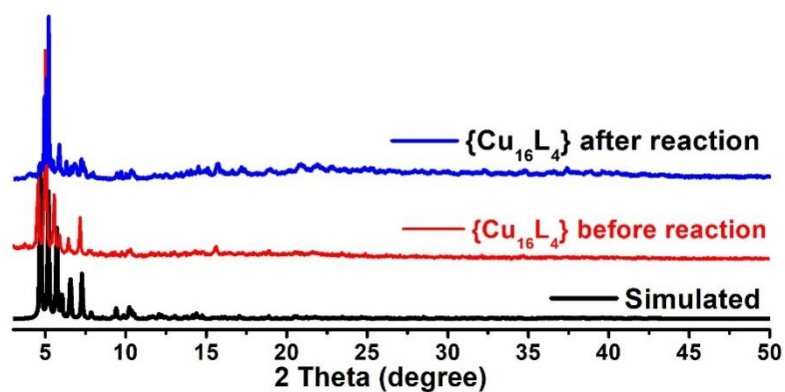

Figure S35. XRD of  $\text{Cu}_{16}\text{L}_4$  before and after catalytic reaction.

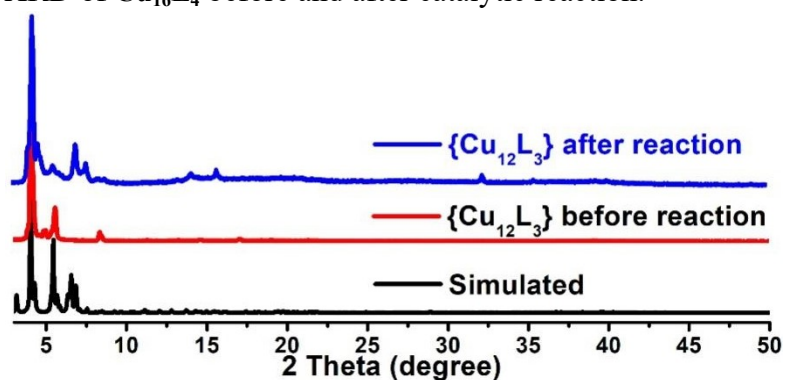

Figure S36. XRD of  $\text{Cu}_{16}\text{L}_4$  before and after catalytic reaction.

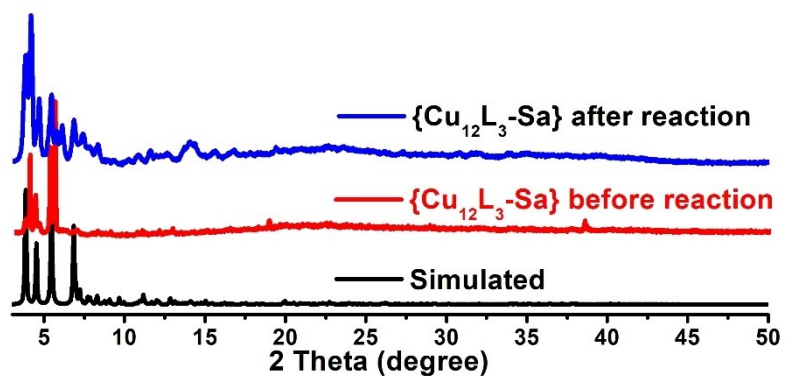

Figure S37. XRD of  $\text{Cu}_{12}\text{L}_3\text{-Sa}$  before and after catalytic reaction.

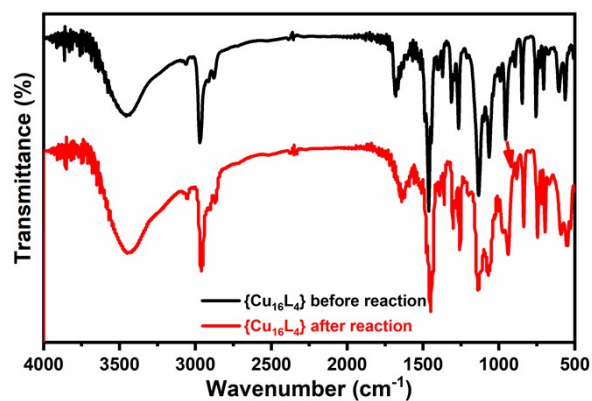

Figure S38. IR spectrum of  $\text{Cu}_{16}\text{L}_4$  before and after catalytic reaction.

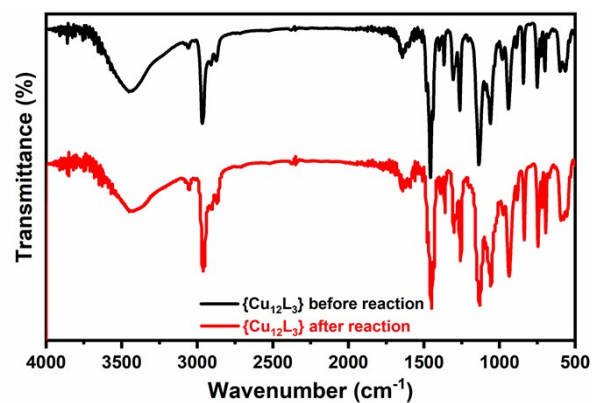

Figure S39. IR spectrum of  $\text{Cu}_{12}\text{L}_3$  before and after catalytic reaction.

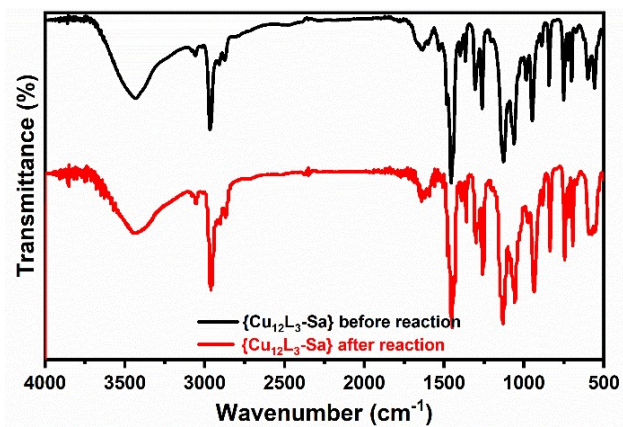

Figure S40. IR spectrum of  $\text{Cu}_{12}\text{L}_3\text{-Sa}$  before and after catalytic reaction.

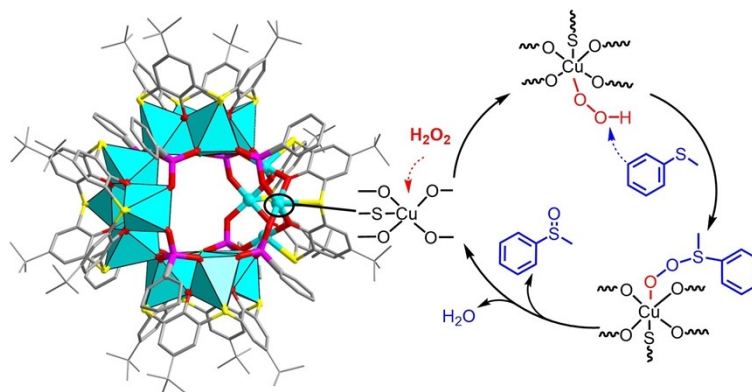

**Figure S41.** Possible catalytic mechanism for the oxidation of phenylmethyl sulfide.

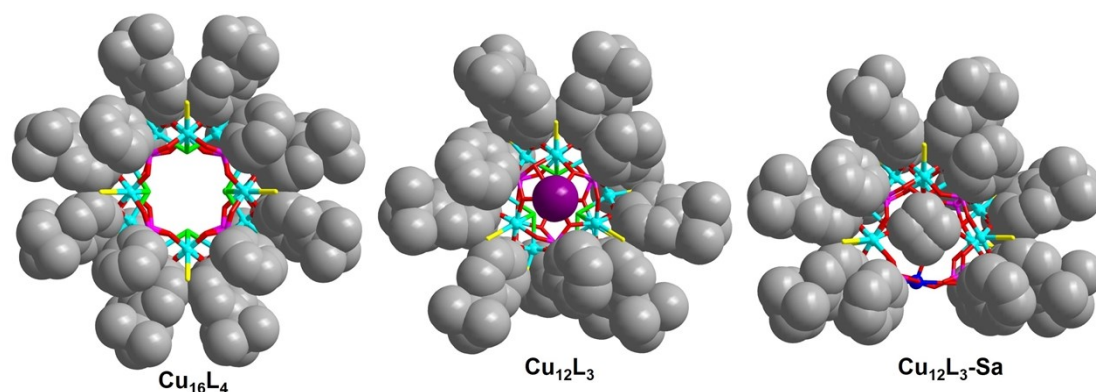

**Figure S42.** Space filling diagram of three structures.

## 12. BVS calculations

**Table S4.** BVS calculation for  $\text{Cu}_{12}\text{L}_3$  and  $\text{Cu}_{12}\text{L}_3\text{-Sa}$ .

| $\text{Cu}_{12}\text{L}_3$ |       |          |       | $\text{Cu}_{12}\text{L}_3\text{-Sa}$ |       |          |       |
|----------------------------|-------|----------|-------|--------------------------------------|-------|----------|-------|
| Atom                       | Atom  | Length/Å | S     | Atom                                 | Atom  | Length/Å | S     |
| Cu1                        | 2.185 |          |       | Cu1                                  | 2.141 |          |       |
| Cu1                        | Cl2   | 2.748    | 0.145 | Cu1                                  | S9    | 2.582    | 0.157 |
| Cu1                        | S11   | 2.577    | 0.160 | Cu1                                  | O2    | 1.984    | 0.439 |
| Cu1                        | O01I  | 1.941    | 0.493 | Cu1                                  | O9    | 1.928    | 0.510 |
| Cu1                        | O01P  | 1.971    | 0.454 | Cu1                                  | O32   | 1.861    | 0.611 |
| Cu1                        | O012  | 1.952    | 0.478 | Cu1                                  | O33   | 1.997    | 0.423 |
| Cu1                        | O013  | 1.970    | 0.455 |                                      |       |          |       |
| Cu2                        | 2.127 |          |       | Cu2                                  | 2.135 |          |       |
| Cu2                        | Cl2   | 2.574    | 0.232 | Cu2                                  | S8    | 2.615    | 0.144 |
| Cu2                        | S12   | 2.625    | 0.140 | Cu2                                  | O7    | 1.982    | 0.441 |
| Cu2                        | O01C  | 1.994    | 0.427 | Cu2                                  | O14   | 1.951    | 0.479 |
| Cu2                        | O01D  | 1.992    | 0.429 | Cu2                                  | O27   | 1.984    | 0.439 |
| Cu2                        | O013  | 1.967    | 0.459 | Cu2                                  | O30   | 2.371    | 0.154 |
| Cu2                        | O018  | 1.983    | 0.440 | Cu2                                  | O31   | 1.952    | 0.478 |
| Cu3                        | 2.269 |          |       | Cu3                                  | 2.079 |          |       |
| Cu3                        | Cl2   | 2.745    | 0.146 | Cu3                                  | S12   | 2.566    | 0.164 |
| Cu3                        | S10   | 2.588    | 0.155 | Cu3                                  | O3    | 2.006    | 0.413 |
| Cu3                        | O01N  | 1.904    | 0.544 | Cu3                                  | O6    | 1.959    | 0.469 |
| Cu3                        | O01R  | 1.923    | 0.517 | Cu3                                  | O13   | 1.907    | 0.540 |
| Cu3                        | O015  | 1.960    | 0.468 | Cu3                                  | O18   | 1.941    | 0.493 |
| Cu3                        | O018  | 1.984    | 0.439 |                                      |       |          |       |
| Cu4                        | 2.141 |          |       | Cu4                                  | 1.880 |          |       |
| Cu4                        | Cl2   | 2.516    | 0.271 | Cu4                                  | S5    | 2.599    | 0.150 |
| Cu4                        | S9    | 2.614    | 0.144 | Cu4                                  | O20   | 1.999    | 0.421 |
| Cu4                        | O010  | 2.005    | 0.414 | Cu4                                  | O28   | 2.027    | 0.390 |
| Cu4                        | O012  | 1.997    | 0.423 | Cu4                                  | O38   | 1.996    | 0.425 |

|      |       |       |       |      |       |       |       |
|------|-------|-------|-------|------|-------|-------|-------|
| Cu4  | O015  | 1.963 | 0.464 | Cu4  | O39   | 1.940 | 0.494 |
| Cu4  | O019  | 1.997 | 0.423 |      |       |       |       |
| Cu5  | 2.137 |       |       | Cu5  | 1.922 |       |       |
| Cu5  | Cl3   | 2.515 | 0.272 | Cu5  | S2    | 2.547 | 0.173 |
| Cu5  | S8    | 2.597 | 0.151 | Cu5  | O8    | 2.013 | 0.405 |
| Cu5  | O010  | 1.975 | 0.449 | Cu5  | O22   | 1.997 | 0.423 |
| Cu5  | O014  | 1.993 | 0.428 | Cu5  | O26   | 1.940 | 0.494 |
| Cu5  | O016  | 1.980 | 0.443 | Cu5  | O31   | 1.995 | 0.426 |
| Cu5  | O019  | 2.024 | 0.394 |      |       |       |       |
| Cu6  | 2.140 |       |       | Cu6  | 2.174 |       |       |
| Cu6  | Cl3   | 2.766 | 0.138 | Cu6  | S11   | 2.545 | 0.174 |
| Cu6  | S7    | 2.574 | 0.161 | Cu6  | O4    | 1.923 | 0.517 |
| Cu6  | O01H  | 1.979 | 0.444 | Cu6  | O19   | 1.875 | 0.589 |
| Cu6  | O01S  | 1.913 | 0.531 | Cu6  | O33   | 1.957 | 0.472 |
| Cu6  | O2    | 2.009 | 0.410 | Cu6  | O38   | 1.998 | 0.422 |
| Cu6  | O016  | 1.970 | 0.455 |      |       |       |       |
| Cu7  | 2.096 |       |       | Cu7  | 2.004 |       |       |
| Cu7  | Cl3   | 2.569 | 0.235 | Cu7  | S1    | 2.624 | 0.140 |
| Cu7  | S5    | 2.618 | 0.143 | Cu7  | O3    | 1.952 | 0.478 |
| Cu7  | O01A  | 2.001 | 0.419 | Cu7  | O10   | 1.986 | 0.436 |
| Cu7  | O01B  | 2.000 | 0.420 | Cu7  | O23   | 1.942 | 0.491 |
| Cu7  | O01H  | 1.976 | 0.448 | Cu7  | O25   | 1.968 | 0.458 |
| Cu7  | O017  | 1.990 | 0.431 |      |       |       |       |
| Cu8  | 2.196 |       |       | Cu8  | 2.098 |       |       |
| Cu8  | Cl3   | 2.767 | 0.138 | Cu8  | S4    | 2.568 | 0.164 |
| Cu8  | S6    | 2.577 | 0.160 | Cu8  | O12   | 1.925 | 0.514 |
| Cu8  | O01G  | 1.912 | 0.533 | Cu8  | O16   | 1.914 | 0.530 |
| Cu8  | O01Q  | 1.985 | 0.437 | Cu8  | O23   | 1.985 | 0.437 |
| Cu8  | O014  | 1.956 | 0.473 | Cu8  | O29   | 1.972 | 0.453 |
| Cu8  | O017  | 1.970 | 0.455 |      |       |       |       |
| Cu9  | 2.109 |       |       | Cu9  | 2.069 |       |       |
| Cu9  | Cl1   | 2.525 | 0.265 | Cu9  | S3    | 2.567 | 0.164 |
| Cu9  | S4    | 2.621 | 0.142 | Cu9  | O14   | 1.975 | 0.449 |
| Cu9  | O01A  | 1.995 | 0.426 | Cu9  | O15   | 1.931 | 0.506 |
| Cu9  | O01B  | 1.997 | 0.423 | Cu9  | O24   | 2.000 | 0.420 |
| Cu9  | O01E  | 1.989 | 0.433 | Cu9  | O40   | 1.914 | 0.530 |
| Cu9  | O01J  | 1.999 | 0.421 |      |       |       |       |
| Cu10 | 1.998 |       |       | Cu10 | 2.142 |       |       |
| Cu10 | S1    | 2.557 | 0.168 | Cu10 | S10   | 2.599 | 0.151 |
| Cu10 | O01J  | 1.980 | 0.443 | Cu10 | O2    | 1.982 | 0.441 |
| Cu10 | O01K  | 1.952 | 0.478 | Cu10 | O10   | 1.978 | 0.446 |
| Cu10 | O01M  | 1.964 | 0.463 | Cu10 | O20   | 1.916 | 0.527 |
| Cu10 | O011  | 1.978 | 0.446 | Cu10 | O25   | 1.991 | 0.430 |
|      |       |       |       | Cu10 | O34   | 2.388 | 0.147 |

|                              |       |                             |       |                             |       |       |       |
|------------------------------|-------|-----------------------------|-------|-----------------------------|-------|-------|-------|
| Cu11                         | 2.134 |                             |       | Cu11                        | 2.109 |       |       |
| Cu11                         | Cl1   | 2.532                       | 0.260 | Cu11                        | S7    | 2.542 | 0.175 |
| Cu11                         | S2    | 2.627                       | 0.139 | Cu11                        | O5    | 1.890 | 0.565 |
| Cu11                         | O01C  | 1.998                       | 0.422 | Cu11                        | O22   | 1.969 | 0.457 |
| Cu11                         | O01D  | 1.993                       | 0.428 | Cu11                        | O24   | 2.014 | 0.404 |
| Cu11                         | O01F  | 1.998                       | 0.422 | Cu11                        | O36   | 1.930 | 0.507 |
| Cu11                         | O011  | 1.964                       | 0.463 |                             |       |       |       |
| Cu12                         | 2.083 |                             |       | Cu12                        | 1.982 |       |       |
| Cu12                         | S3    | 2.568                       | 0.164 | Cu12                        | S6    | 2.579 | 0.159 |
| Cu12                         | O01E  | 1.984                       | 0.439 | Cu12                        | O6    | 1.977 | 0.447 |
| Cu12                         | O01F  | 1.963                       | 0.464 | Cu12                        | O7    | 1.982 | 0.441 |
| Cu12                         | O01L  | 1.940                       | 0.494 | Cu12                        | O27   | 1.959 | 0.469 |
| Cu12                         | O01O  | 1.919                       | 0.523 | Cu12                        | O29   | 1.961 | 0.467 |
| R <sub>0</sub> (Cu-Cl)=2.033 |       | R <sub>0</sub> (Cu-S)=1.898 |       | R <sub>0</sub> (Cu-O)=1.679 |       |       |       |

**Table S5.** BVS calculation for {Cu<sub>16</sub>L<sub>4</sub>} and {Cu<sub>16</sub>L<sub>4</sub>-Sa} .

| {Cu <sub>16</sub> L <sub>4</sub> } |       |          |       | {Cu <sub>16</sub> L <sub>4</sub> -Sa} |       |          |       |
|------------------------------------|-------|----------|-------|---------------------------------------|-------|----------|-------|
| Atom                               | Atom  | Length/Å | S     | Atom                                  | Atom  | Length/Å | S     |
| Cu1                                | 2.122 |          |       | Cu1                                   | 1.975 |          |       |
| Cu1                                | Cl0L  | 2.619    | 0.205 | Cu1                                   | S00G  | 2.589    | 0.154 |
| Cu1                                | S00F  | 2.625    | 0.140 | Cu1                                   | Cl0K  | 2.594    | 0.220 |
| Cu1                                | O00T  | 1.964    | 0.463 | Cu1                                   | O71   | 1.967    | 0.459 |
| Cu1                                | O00W  | 1.977    | 0.447 | Cu1                                   | O70   | 2.070    | 0.348 |
| Cu1                                | O00Y  | 1.980    | 0.443 | Cu1                                   | O71   | 1.983    | 0.440 |
| Cu1                                | O011  | 1.997    | 0.423 | Cu1                                   | O79   | 2.063    | 0.354 |
| Cu2                                | 2.096 |          |       | Cu2                                   | 2.098 |          |       |
| Cu2                                | Cl0L  | 2.674    | 0.177 | Cu2                                   | S00A  | 2.632    | 0.137 |
| Cu2                                | S00I  | 2.613    | 0.145 | Cu2                                   | Cl0K  | 2.718    | 0.157 |
| Cu2                                | O00T  | 1.975    | 0.449 | Cu2                                   | O00N  | 1.995    | 0.426 |
| Cu2                                | O00U  | 2.021    | 0.397 | Cu2                                   | O71   | 1.994    | 0.427 |
| Cu2                                | O015  | 1.989    | 0.433 | Cu2                                   | O67   | 1.940    | 0.494 |
| Cu2                                | O62   | 1.939    | 0.495 | Cu2                                   | O012  | 1.969    | 0.457 |
| Cu3                                | 2.108 |          |       | Cu3                                   | 2.112 |          |       |
| Cu3                                | Cl0L1 | 2.610    | 0.210 | Cu3                                   | S00B  | 2.628    | 0.139 |
| Cu3                                | S00D1 | 2.671    | 0.124 | Cu3                                   | Cl0K  | 2.715    | 0.158 |
| Cu3                                | O00U1 | 1.991    | 0.430 | Cu3                                   | O00N  | 1.968    | 0.458 |
| Cu3                                | O00V  | 2.014    | 0.404 | Cu3                                   | O00Q  | 1.979    | 0.444 |
| Cu3                                | O601  | 1.943    | 0.490 | Cu3                                   | O661  | 1.970    | 0.455 |
| Cu3                                | O61   | 1.975    | 0.449 | Cu3                                   | O72   | 1.969    | 0.457 |
| Cu4                                | 2.157 |          |       | Cu4                                   | 2.108 |          |       |
| Cu4                                | Cl0M  | 2.568    | 0.236 | Cu4                                   | S00E1 | 2.612    | 0.145 |
| Cu4                                | S00B  | 2.638    | 0.135 | Cu4                                   | Cl0I1 | 2.728    | 0.153 |
| Cu4                                | O00N  | 2.008    | 0.411 | Cu4                                   | O00M1 | 2.014    | 0.404 |
| Cu4                                | O00O  | 2.014    | 0.404 | Cu4                                   | O00O1 | 1.990    | 0.431 |
| Cu4                                | O63   | 1.944    | 0.489 | Cu4                                   | O63   | 1.957    | 0.472 |

|                              |       |                             |       |                             |       |       |       |
|------------------------------|-------|-----------------------------|-------|-----------------------------|-------|-------|-------|
| Cu4                          | O64   | 1.949                       | 0.482 | Cu4                         | O68   | 1.934 | 0.502 |
| Cu5                          | 2.121 |                             |       | Cu5                         | 2.277 |       |       |
| Cu5                          | Cl0M  | 2.661                       | 0.183 | Cu5                         | Cl0K1 | 2.599 | 0.217 |
| Cu5                          | S00C  | 2.611                       | 0.146 | Cu5                         | S00L1 | 2.638 | 0.135 |
| Cu5                          | O00N  | 1.980                       | 0.443 | Cu5                         | O721  | 1.989 | 0.433 |
| Cu5                          | O00P  | 1.957                       | 0.472 | Cu5                         | O791  | 1.993 | 0.428 |
| Cu5                          | O00W  | 1.965                       | 0.462 | Cu5                         | O64   | 1.921 | 0.520 |
| Cu5                          | O011  | 2.004                       | 0.415 | Cu5                         | O8    | 1.904 | 0.544 |
| Cu6                          | 2.145 |                             |       | Cu6                         | 2.034 |       |       |
| Cu6                          | Cl0M  | 2.566                       | 0.237 | Cu6                         | S00H  | 2.603 | 0.149 |
| Cu6                          | S00A  | 2.664                       | 0.126 | Cu6                         | Cl0I  | 2.567 | 0.236 |
| Cu6                          | O00P  | 1.993                       | 0.428 | Cu6                         | O00M  | 2.022 | 0.396 |
| Cu6                          | O00Q  | 2.013                       | 0.405 | Cu6                         | O00S  | 1.954 | 0.476 |
| Cu6                          | O016  | 1.976                       | 0.448 | Cu6                         | O701  | 1.966 | 0.460 |
| Cu6                          | O651  | 1.935                       | 0.501 | Cu6                         | O7    | 2.103 | 0.318 |
| Cu7                          | 2.077 |                             |       | Cu7                         | 2.215 |       |       |
| Cu7                          | Cl0M  | 2.707                       | 0.162 | Cu7                         | Cl0I  | 2.651 | 0.188 |
| Cu7                          | S009  | 2.611                       | 0.146 | Cu7                         | S00J  | 2.607 | 0.147 |
| Cu7                          | O00O  | 1.951                       | 0.479 | Cu7                         | O00R  | 1.993 | 0.428 |
| Cu7                          | O00Q  | 1.996                       | 0.425 | Cu7                         | O00S  | 2.001 | 0.419 |
| Cu7                          | O00V  | 1.970                       | 0.455 | Cu7                         | O80   | 1.918 | 0.524 |
| Cu7                          | O61   | 2.009                       | 0.410 | Cu7                         | O6    | 1.929 | 0.509 |
| Cu8                          | 2.097 |                             |       | Cu8                         | 2.109 |       |       |
| Cu8                          | Cl0L  | 2.690                       | 0.169 | Cu8                         | S009  | 2.628 | 0.139 |
| Cu8                          | S00K  | 2.632                       | 0.137 | Cu8                         | Cl0I  | 2.726 | 0.154 |
| Cu8                          | O00Y  | 2.010                       | 0.409 | Cu8                         | O00O  | 1.950 | 0.481 |
| Cu8                          | O010  | 1.947                       | 0.485 | Cu8                         | O00Q  | 1.992 | 0.429 |
| Cu8                          | O014  | 1.948                       | 0.483 | Cu8                         | O00R  | 1.975 | 0.449 |
| Cu8                          | O60   | 2.006                       | 0.413 | Cu8                         | O661  | 1.969 | 0.457 |
| R <sub>0</sub> (Cu-Cl)=2.033 |       | R <sub>0</sub> (Cu-S)=1.898 |       | R <sub>0</sub> (Cu-O)=1.679 |       |       |       |
